1 Limited haplotype diversity underlies polygenic trait architecture  
2 across 70 years of wheat breeding

3

4 **Authors:** Michael F. Scott<sup>1</sup>, Nick Fradgley<sup>2</sup>, Alison R. Bentley<sup>2</sup>, Thomas Brabbs<sup>3</sup>, Fiona Corke<sup>4</sup>,  
5 Keith A. Gardner<sup>2</sup>, Richard Horsnell<sup>2</sup>, Phil Howell<sup>2</sup>, Olufunmilayo Ladejobi<sup>1</sup>, Ian J. Mackay<sup>2†</sup>,  
6 Richard Mott<sup>1</sup>, James Cockram<sup>2</sup>

7

8 <sup>1</sup> UCL Genetics Institute, Gower St London WC1E 6BT, United Kingdom

9 <sup>2</sup> NIAB, 93 Lawrence Weaver Road, Cambridge, CB3 0LE, United Kingdom

10 <sup>3</sup> Norwich Research Park Innovation Centre, Colney Ln, Norwich NR4 7UZ, United Kingdom

11 <sup>4</sup> The National Plant Phenomics Centre, Institute of Biological, Rural and Environmental  
12 Sciences (IBERS), Aberystwyth University, Gogerddan, Aberystwyth, SY23 3EE, United  
13 Kingdom

14 <sup>†</sup> Current address: SRUC, Peter Wilson Building King's Buildings, W Mains Rd, Edinburgh EH9  
15 3JG, United Kingdom

16

17 **Corresponding authors:**

18 Richard Mott [r.mott@ucl.ac.uk](mailto:r.mott@ucl.ac.uk), James Cockram [james.cockram@niab.com](mailto:james.cockram@niab.com)

19

20 **These authors contributed equally:**

21 Michael F Scott and Nick Fradgley; Richard Mott and James Cockram

22

## 23 **Abstract**

### 24 *Background*

25 Breeding has helped improve bread wheat yield significantly over the last century.  
26 Understanding the potential for future crop improvement depends on relating segregating  
27 genetic variation to agronomic traits.

### 28 *Results*

29 We bred NIAB Diverse MAGIC population, comprising over 500 recombinant inbred lines,  
30 descended from sixteen bread wheat varieties released between 1935-2004. We sequenced  
31 the founders' exomes and promoters by capture. Despite being highly representative of  
32 North-West European wheat and capturing 73% of global polymorphism, we found 89% of  
33 genes contained no more than three haplotypes. We sequenced each line with 0.3x  
34 coverage whole-genome sequencing, and imputed 1.1M high-quality SNPs that were over  
35 99% concordant with array genotypes. Imputation accuracy remained high at coverage as  
36 low as 0.076x, with or without the use of founder genomes as reference panels. We created  
37 a genotype-phenotype map for 47 traits over two years. We found 136 genome-wide  
38 significant associations, concentrated at 42 genetic loci with large and often pleiotropic  
39 effects. Outside of these loci most traits are polygenic, as revealed by multi-locus shrinkage  
40 modelling.

### 41 *Conclusions*

42 Historically, wheat breeding has reshuffled a limited palette of haplotypes; continued  
43 improvement will require selection at dozens of loci of diminishing effect, as most of the  
44 major loci we mapped are known. Breeding to optimise one trait generates correlated trait  
45 changes, exemplified by the negative trade-off between yield and protein content, unless

46 selection and recombination can break critical unfavourable trait-trait associations. Finally,  
47 low coverage whole genome sequencing of bread wheat populations is an economical and  
48 accurate genotyping strategy.

49

## 50 Introduction

51 Bread wheat (*Triticum aestivum* L.) production is a critical component of worldwide food  
52 security. Demand for wheat is predicted to increase by 60% between 2014 and 2050[1], by  
53 which time the human population will have reached 9 billion. Breeding will be a key  
54 component of meeting this demand sustainably[2]. Over the past century, genetic gains have  
55 been responsible for between one third and two thirds of yield improvements in European  
56 wheats, amounting to a 12-120kg increase in yield (~1%) per hectare per year[3–6].

57

58 Genomic data is expected to accelerate the rate of genetic gain in wheat[7,8]. Surveys of  
59 global standing genetic variation include, for example, whole genome resequencing (WGS) of  
60 93 accessions[9], exome capture for 870 accessions[10], genotyping by sequencing (~16k  
61 markers) for ~17k breeding programme lines[11], and genotyping array data for collections  
62 of 804[12] and 4,500[13] accessions (~15k and ~113k markers, respectively). Bread wheat's  
63 large genome size (17Gb) inflates the cost of collecting sequencing data and its hexaploidy  
64 reduces the accuracy and cross-population consistency of genotyping array data[12]. The  
65 potential for genotyping by low-coverage WGS in polyploid wheat has yet to be established.

66

67 To aid genetic gain through breeding, it is crucial to link genetic data with phenotypic  
68 information and thereby reveal genotype-phenotype associations[11,14]. Previous

69 genotypic/phenotypic datasets include five traits measured in two years for 870 global  
70 accessions with exome capture data[10], and 12 traits measured in two years, six locations,  
71 and three cropping intensities for 191 German varieties with genotyping array data (~9k  
72 markers)[15]. Genotype-trait and trait-trait associations may be confounded by population  
73 structure or hidden by low allele frequencies in studies of existing varieties or breeding lines.  
74 These problems can be controlled in experimental populations produced by crossing.  
75 However, mapping resolution and overall genetic diversity are typically low in experimental  
76 populations. Multiparent Advanced Generation Intercross (MAGIC) populations are designed  
77 to address these issues by accumulating recombination events through generations of  
78 intercrossing and capturing diversity across multiple founders[16–18].

79  
80 In this study we undertook a systematic approach to these challenges. We bred a new multi-  
81 parental population, the ‘NIAB DIVERSE MAGIC’ population (hereafter ‘NDM’) through  
82 hundreds of structured inter-crosses between sixteen diverse founders. Our multi-funnel  
83 crossing design creates a greater number and more uniform genome-wide distribution of  
84 recombinant haplotypes than alternative multiparent populations[19] and the relatively large  
85 number of diverse founders samples more genetic variation. We sampled founders released  
86 between 1935-2004, aiming to determine the genetic basis for historical changes in  
87 agronomic traits and the potential for future improvement from within the existing pool of  
88 variants. We used a cost-effective genotyping strategy by low-coverage WGS, accurately  
89 imputing over 1M SNPs in over 500 recombinant inbred lines. We measured 47 phenotypes  
90 in the population, of which 25 were assessed across two growing seasons. The power of NDM  
91 comes from the combination of carefully designed germplasm and dense genotypic and  
92 phenotypic information, all of which we make publicly available.

93

94 We address the following questions. First, what genetic variation exists among the exomes of  
95 the NDM founders, how does it reflect global wheat diversity, and specifically how many  
96 distinct haplotypes typically segregate at each locus? Second, how does this variation underlie  
97 agronomic traits, as revealed through genetic mapping and genomic prediction? And third,  
98 what do these models imply about the future potential for phenotypic change and to what  
99 extent should we expect selection to cause correlated trait changes due to the sharing of  
100 causal genetic variants between traits.

101

## 102 Results

### 103 *NIAB DIVERSE MAGIC Founders*

104 The 16 founders were selected from a panel of 94 historical varieties released in the UK over  
105 a ~70 year period (and originating from the UK, France, Denmark, Sweden and the  
106 Netherlands, Supplementary Table 1) using 546 Diversity Array Technology (DArT) and 61  
107 Single Sequence Repeat (SSR) markers[20]. We sequenced 15 founders after enrichment for  
108 (a) genic regions and (b) putative promoters using a capture probe-set[21] at average  
109 coverage of 22.94x of the targets (Supplementary Table 1). The remaining founder, Holdfast,  
110 was sequenced by WGS, but to ensure consistency across founders, we restricted our  
111 attention to the capture targets, for which coverage in Holdfast was 15.8x. We sequenced  
112 using Illumina 150bp paired-end reads whose combined length often included sequence  
113 differences between homeologous loci on the A, B and D subgenomes of hexaploid wheat,  
114 thereby resolving otherwise ambiguous alignments. Furthermore, we only used high quality  
115 alignments (mapQ>30) for coverage calculations and variant calling, and subsequently

116 excluded variant sites with missing or heterozygous calls in any founder (e.g. from  
117 homeologous variation and misalignment). After quality control, we called 1.13M high-quality  
118 single nucleotide polymorphisms (SNPs) across the 110,790 promoter-gene pairs targeted by  
119 the capture probes (557Mb in total), summarised in Supplementary Figure 1. Only 97,727  
120 SNPs (8.7%) were on the D subgenome and almost half (17,289/35,021, 49.4%) of the  
121 promoter-gene pairs on the D subgenome had no SNPs passing quality control, compared to  
122 26.6% (9,656/36,302) and 21.7% (8,012/36,738) on the A and B subgenomes, respectively. A  
123 comparative lack of diversity is expected on the D subgenome as it was acquired in the most  
124 recent allo-polyploidisation event[22].

125

126 We placed the 16 founders in the context of global wheat diversity by analysing 113,457  
127 genotyping array sites that vary among 4,506 diverse global wheat accessions[13], of which  
128 50,335 sites were callable across all founders. We classified global wheats into nested subsets  
129 representing the UK only (n=154), North-West (NW) Europe (n=1,343), Europe (n=2,331), and  
130 Global (n=4,506), to understand how allele frequencies across subsets relate to our founders  
131 (Figure 1). Most Global common variants are polymorphic in the founders whereas rare alleles  
132 are more likely to be fixed in the founders, particularly those scarce in NW Europe and the  
133 UK. For example, 79.7% of those SNPs polymorphic within the UK subset (which includes  
134 landraces) also segregate among the founders, falling to 73.4% Global sites across all 4,506  
135 accessions. We next asked whether we could have selected 16 founders that more  
136 comprehensively sampled the variation space. We simulated selections from the same nested  
137 subsets and compared the distribution of the fraction of segregating sites with that in the  
138 actual NDM founders, and found the latter capture more diversity than an average selection  
139 of UK wheats, about average diversity for NW European wheats, but less than average for

140 wider European and Global sets (Figure 1). As the Global dataset is highly diverse, with  
 141 modern varieties (released 1960-2009, n=2,294), landraces (1800-1959, n=965), and  
 142 uncategorised/landrace germplasm (n=1,247), we conclude that NDM is representative of  
 143 NW European wheat germplasm.

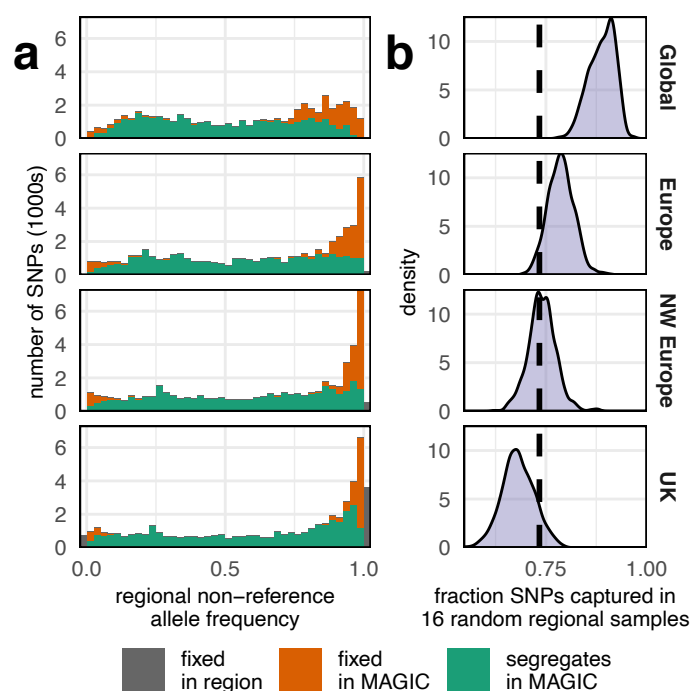

145 **Figure 1** The NDM population is representative of NW European wheat. (a) SNPs segregating (green) or fixed  
 146 (orange) in NDM at 50,335 sites in 4,506 global wheats, grouped into 'Global', 'European', 'North-West  
 147 European' and 'UK' nested subpopulations and binned by the allele frequency in these subpopulations. (b) The  
 148 fraction of sites that are polymorphic in 16 randomly chosen wheats from each subpopulation based on 1000  
 149 random replications. The dashed vertical black line at  $x=0.734$  is the fraction of SNPs segregating among NDM  
 150 founders.

151 We next estimated the haplotypic diversity in the founders at the 1.13M sites. First, we  
 152 clustered the founders by their haplotypic similarity at the 73,982/110,790 (66.7%) promoter-  
 153 gene loci with at least two haplotypes. Assuming that founders carry the same haplotype  
 154 when their genotypic similarity exceeds 95%, 38,535 loci (52% of loci with variants) had only  
 155 two haplotypes, 61,438 loci (83%) had at most three haplotypes, and 70,602 loci (95%) had  
 156 four haplotypes at most (Figure 2b). Second, we estimated haplotype diversity by a dynamic  
 157 programming algorithm that adjusted locus/block boundaries (Figure 2c, Supplementary  
 158 Figure 2) to minimise the number of distinct haplotypes within a locus, while balancing

159 transitions between calling identical versus non-identical haplotypes. Over a wide range of  
160 parameters, the average number of haplotypes present at any locus rarely exceeded two  
161 (Supplementary Figure 2: 81.2% of 1.13M sites inferred to have just two haplotypes). This  
162 analysis found slightly fewer haplotypes than the gene-based analysis because it can infer one  
163 haplotype (4.1% of sites) when nearby variation is inconsistent, and split genes with high  
164 haplotypic diversity into multiple blocks.

165

166 For comparison, the 19 natural accessions that founded the *Arabidopsis thaliana* MAGIC[23]  
167 display much greater haplotypic polymorphism[24]. In *A. thaliana*, genic haplotypes were  
168 determined at the level of protein sequence similarity (>95% similarity within  
169 haplotypes)[24]. On average there were 4.8 protein haplotypes per gene and 7,263/13,919  
170 (52.2%) of genes with two (n=4,825) or three (n=2,438) haplotypes (excluding genes with no  
171 variation). Our estimates for the NDM founders are 2.7 haplotypes per gene and 83% of  
172 variable genes having at most three haplotypes. Protein-level differences are lower than DNA  
173 level differences making this comparison conservative, and thus the true difference is even  
174 greater.

175

### 176 *The NIAB DIVERSE MAGIC Population*

177 We developed a total of 596 Recombinant Inbred Lines (RILs), each descended from all 16  
178 founders via a crossing funnel (Figure 2a). After 6 generations of inbreeding, all 596 RILs were  
179 initially genotyped using the Axiom 35k wheat breeders' SNP genotyping array[12]. We called  
180 SNPs at 20,688 sites, of which 5,747 overlapped with the 1.13M SNP calls made in the  
181 founders. These overlapping sites suggested that only 59.8% of genotyping array probes could  
182 have been unambiguously placed using BLASTn[25], underlining the difficulty of using short



183 probes in polyploids (Supplementary Table 2). We used the overlapping sites as a truth  
 184 genotype set to find sample misidentifications and estimate the accuracy of sequence-based  
 185 genotyping in the RILs.  
 186  
 187 We excluded 46 RILs excessively similar (>92%) to other RILs, indicating possible errors during  
 188 population development. We sequenced the remaining 550 RILs after 7 generations of  
 189 inbreeding by low coverage WGS (mean 0.304X) and called variants at the 1.13M founder SNP  
 190 sites using sequence alignments. A further 46 RILs were excluded as their genotypic  
 191 concordance with the initial 35k array data was below 95%, leaving 504 RILs in 141 families  
 192 (RILs in the same ‘family’ are derived from the same 16-way cross), from which we based our  
 193 main analyses.

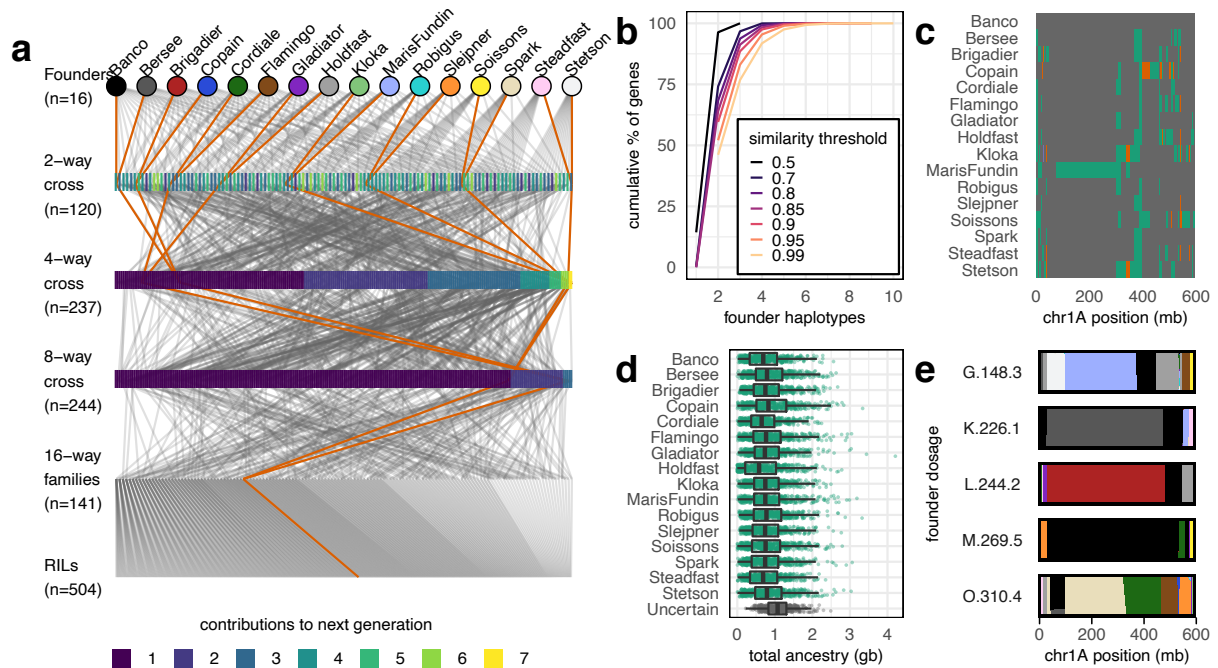

194

195 **Figure 2** NDM population design and haplotypic diversity. (a) Pedigree showing the construction of 504  
 196 Recombinant Inbred Lines (RILs). One exemplar pedigree is highlighted to show how all 16 founders are  
 197 intercrossed into each RIL. (b) Founder haplotype groups at 73,982 promoter-gene loci with SNP variation, where  
 198 founders with the same haplotype have genotypic similarity fractions that exceed the corresponding threshold.  
 199 (c) Pairwise similarity/dissimilarity between founders on chromosome 1A, determined using a dynamic  
 200 programming algorithm to infer founder similarity and breakpoint position. Founders that are inferred to have  
 201 similar haplotypes for each region are the same colour. (d) The total length of genomic blocks in NDM lines  
 202 inferred to come from each founder; uncertain ancestry blocks have a maximum founder dosage of <90%. (e)

203 *Inferred founder dosage and ancestry mosaics across chromosome 1A for five example RILs, with founders*  
204 *coloured as in (a).*

205 We imputed RIL genotypes using STITCH[26] by inferring the founder haplotype carried by  
206 each line at each location. Figure 2c shows the haplotypic similarity among founders on  
207 chromosome 1A, indicating that a small number of haplotypes have been heavily recombined  
208 during the 69 years of breeding history that separates the founders. Most recombination is  
209 located towards the distal ends of the chromosomes, as expected[27]. Only limited further  
210 recombination occurs during MAGIC population construction and the haplotype blocks  
211 inherited from each founder are relatively long (Supplementary Figure 2) and therefore  
212 distinguishable from one another. Thus, it was necessary to assume 16 unique haplotypes  
213 were segregating to obtain the highest imputation accuracy (Supplementary Figure 2).  
214 Founder haplotypes could be confidently assigned (i.e. with >90% dosage from a single  
215 founder) at over 92.2% of sites (Figure 2d). These haplotype assignments implied that an  
216 average of 4.8-13.7 recombination events occurred per RIL per chromosome (mean 8.7 sd 2),  
217 giving an average of 183 (sd 36.3) recombination events per RIL in total. Consistent with  
218 estimated genetic map lengths of 35-37.4M[12,28], 4.9-5.2 recombination events were  
219 observed per Morgan, in line with the predicted ~5-fold increase in 16-parent MAGIC  
220 populations compared to two-way crosses[29]. Example founder haplotype mosaics across  
221 chromosome 1A are shown in Figure 2e.

222

223 The fraction of sites called directly (i.e. without imputation) for 501 RILs varied between 20.9-  
224 42.7% (mean 27.8% sd 3.4%), as expected for 0.3x-coverage sequence data. A further three  
225 RILs were sequenced to higher depth (2.7x, 4.0x, and 4.3x) and had call rates of 79.9%, 90.0%,  
226 and 93.0%, respectively (Figure 3a). After imputation, 94.2% of the 1.13M SNPs (i.e. 1.07M)  
227 were called across all 504 RILs and the effective call rate of imputed sites was 99.6%, with

228 5.8% of the SNP sites inaccessible or removed by quality control: 0.93% of sites are on the  
229 “Un” chromosome in the wheat reference (excluded from imputation), 1.36% were removed  
230 by imputation QC (info score <0.4) and 3.52% had imputed minor allele frequencies below  
231 2.5% and/or missingness above 90%. Figure 3b shows that the concordance between array  
232 and imputed genotypes (AI) and between array and directly called genotypes (AD) are  
233 strongly correlated, suggesting that instances of poorer concordance are unlikely to be caused  
234 by imputation. Overall, imputation marginally improved accuracy versus direct calls (mean AI  
235 99.1% versus mean AD 99.0%) but increased the call rate three-fold. Downsampling read  
236 coverage showed the founder haplotype space and recombination mosaics could be  
237 accurately inferred from coverage as low as 0.076x per sample (Figure 3c); above this level  
238 imputation accuracy was independent of whether founder haplotypes were included as a  
239 reference panel (mean AI 98.7%) or ignored (mean AI 98.5%).

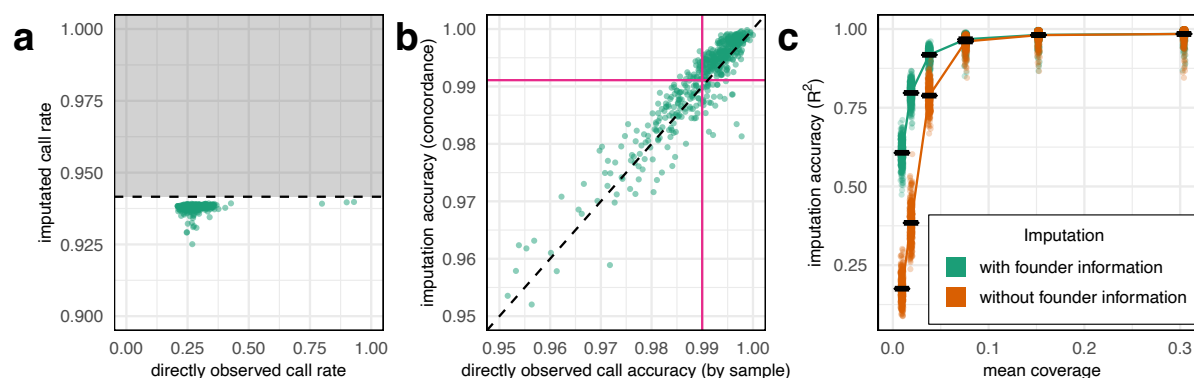

240

241 **Figure 3** Call rate and accuracy of genotypes after imputation and after downsampling. (a) Imputed call rate (y-  
242 axis) vs direct call rate (x-axis). Only 28.1% of the 1,131,251 SNP sites can be genotyped directly from the low  
243 coverage sequence data, whereas 93.8% of sites had genotypes after imputation. 5.8% of sites (grey region and  
244 horizontal dashed line in a) were removed by quality control filters after imputation or on the unimputed ‘Un’  
245 chromosome (0.93%). (b,c) Accuracy as evaluated at 5,747 sites that overlap with the Axiom 35k array. (c)  
246 Imputation before/after downsampling was performed with (green) and without (orange) using the genotypes  
247 of the founders as a reference panel.

248

## 249 *Introgessions and Segregation Bias*

250 Several recent studies have used genomic data (e.g., SNP density[9]) to study the  
251 introgression of genetic material into hexaploid bread wheat from the secondary and tertiary  
252 gene pool[9,10,30]. We examined evidence for introgressions in previously reported  
253 locations[9,31–33] using founder coverage and non-reference allele frequency. Because we  
254 developed RILs, we were also able to examine segregation bias, which often accompanies  
255 wheat introgressions[34,35]. We found evidence for at least six introgressions covering  
256 ~1.1Gb segregating in the population, five of which showed segregation bias (Supplementary  
257 Table 3).

## 258 259 *Phenotypic Characterisation and QTL Mapping*

260 We measured 47 phenotypes in replicated field trials over two years (Table 1, Supplementary  
261 Tables 4, 5, and 6), including the 10 time points at which Green Leaf Area (GLA) was measured.  
262 Of these, 25 phenotypes were collected in both years and two were also measured in smaller  
263 1x1m nursery plots (Yellow Rust infection, YR, and Juvenile Growth Habit, JGH) to give a total  
264 of 73 phenotypic measurements. Phenotype distributions are shown in Supplementary Figure  
265 3, showing that some RILs have more extreme phenotypes than any founder (transgressive  
266 segregation) for almost all phenotypes (RIL maximum  $\geq$  founder maximum for 61/73  
267 phenotypes and RIL minimum  $\leq$  founder minimum for 68/73 phenotypes). All phenotypes  
268 have significant ( $p < 0.05$ , Pearson's correlation test) correlations with at least one other  
269 phenotype (Supplementary Figure 4).

270 *Table 1 Phenotypes collected*

| ABBREVIATION | TRAIT                     | ABBREVIATION | TRAIT              |
|--------------|---------------------------|--------------|--------------------|
| BIS          | Basal infertile spikelets | GS55         | Ear emergence date |
| EL           | Ear length                | GS65         | Anthesis date      |
| ETA          | Ear taper                 | GW           | Grain width        |
| ETS          | Ear tip sterility         | GY           | Yield              |

|      |                                           |      |                          |
|------|-------------------------------------------|------|--------------------------|
| EW   | Ear weight                                | HEB  | Height to ear base       |
| FLA  | Flag leaf angle                           | HET  | Height to ear tip        |
| FLED | Flag leaf to ear distance                 | HFLB | Height to flag leaf base |
| FLF  | Flag leaf floppiness                      | JGH  | Juvenile growth habit    |
| FLL  | Flag leaf length                          | LOD  | Lodging                  |
| FLS  | Flag leaf senescence                      | PHS  | Pre-harvest sprouting    |
| FLW  | Flag leaf width                           | PIG  | General pigmentation     |
| GA   | Grain area                                | SH   | Spring habit             |
| GL   | Grain length                              | SPIG | Stem pigmentation        |
| GLA# | Green leaf area (10 time points, Nov–Mar) | SW   | Specific weight          |
| GLAU | Glaucosity                                | TGW  | Thousand grain weight    |
| GPC  | Grain protein content                     | TIS  | Tip infertile spikelets  |
| GR   | Germination rate                          | TS   | Total spikelets          |
| GS39 | Flag leaf emergence date                  | YR   | Yellow rust infection    |

271

272 From the 1.07M imputed SNPs, we selected a subset of 55,067 pruned by linkage  
273 disequilibrium (LD). Using genome-wide association scans (GWAS) on both SNP and founder  
274 haplotype data, we mapped 136 Quantitative Trait Loci (QTLs) across the 73 phenotype/year  
275 combinations that were genome-wide significant at the 5% level. Many QTLs overlapped for  
276 different phenotypes, clustering into 42 distinct genome locations. For 25 phenotypes that  
277 were measured in both years, we found 48 QTLs in year 1 and 49 QTLs in year 2, of which 28  
278 were mapped to the same location and were genome-wide significant in both years. For  
279 example, in replicated trials lacking fungicide treatment we mapped yellow rust (*Puccinia*  
280 *striiformis*) susceptibility to four QTLs in year 2 (on chromosomes 2A[31,36], 2B[37], 3B, and  
281 6A), of which three were also mapped in year 1 (2A, 3B, and 6A); only one (6A) was also  
282 mapped in trials treated with fungicide. 126/136 QTLs at 40/42 genomic locations were  
283 mapped using SNP-based associations, whereas 87/136 QTLs at 30/42 genomic locations  
284 were mapped using haplotype-based association tests. That is, 10 QTLs and two genomic  
285 locations were only identified from haplotype-based association whereas 49 QTLs and 12  
286 genomic locations were only identified from SNP-based association. This is consistent with  
287 the limited gene-level haplotypic diversity observed among the founders.

288

289 Figure 4b summarises the 40 loci with genome-wide significant SNP-based associations. We  
290 were able to assign 21 of these, including most of those with the strongest effects, to  
291 previously reported QTLs. In 11 high confidence cases, candidate genes have been reported  
292 and/or validated experimentally. In other cases, QTLs contained homeologs or paralogs of  
293 these high confidence candidates, or previous studies had reported associations to a genetic  
294 map using marker data, but not firmly anchored these locations on the reference genome  
295 assembly (low confidence co-localisation, n=10). We checked six high confidence candidate  
296 loci with annotated reference genome locations (*RHT-1*[38], *RHT-2*[39], *WAPO-A1*[40], *ALI-*  
297 *1*[41], *TaMyb10-B1*[42], *Yr7/Yr5/YrSP*[37], *PPD-D1*[43]), all of which were within our mapping  
298 intervals. We created a genotype-phenotype map for community use by placing all QTLs on  
299 the physical map (Supplementary Table 7) to a median interval of 9.2Mb.

300

301 Most loci with strong effect co-localise with previously reported QTLs. Some large effects are  
302 commonly associated with adaptation of the founders to the geographic and temporal range  
303 they sample. For example, the early flowering allele at the photoperiod locus *PPD-D1* carried  
304 by the founder Soissons is favoured in southern Europe to avoid the summer drought[44].  
305 The modern semi-dwarfing alleles at *RHT-B1* or *RHT-D1* that have been favoured globally  
306 since the Green Revolution[45] are absent from founders Banco, Bersee, Copain, Flamingo,  
307 Holdfast, Kloka, Spark, Steadfast and Stetson.

308

309 To examine the pleiotropic effects of the relatively few genome-wide significant QTLs, we  
310 took the most strongly associated SNP at each locus and then tested for associations with all  
311 other phenotypes, requiring a lower threshold for evidence of association ( $p < 0.05$ ) than was  
312 initially used to establish genome-wide significance. The results are visualised in Figure 4d,

313 which shows that loci significant for one phenotype are also common to other phenotypes,  
314 consistent with extensive pleiotropy and the shared genetic control of correlated phenotypes.

315

### 316 *Gene Deletions*

317 Our analysis of SNP variation ignored sites that could not be called reliably in all 16 founders,  
318 possibly due to whole-gene deletions relative to the reference genome. We obtained no  
319 coverage from at least one founder at 8,019 (7.2%) of genic regions and 1,095 (1.1%) of  
320 promoter-gene pairs, suggesting possible structural variations (Supplementary Figure 1).

321 Based on the deviation in gene coverage from that expected given the mean coverage for the  
322 founder, we computed a quantitative gene deletion score (GDS) for each gene and founder  
323 and imputed the scores into the RILs using the founder ancestry mosaics. We tested the  
324 association between each GDS and each phenotype in order to identify potential causal  
325 deletions. Across 27/73 phenotypes we found 30 GDS associations with p-values  $<10^{-6}$   
326 (Supplementary Table 8). Significant associations almost always occurred within QTLs  
327 previously mapped by SNP association, so this analysis only identified candidate genes with  
328 deletion status consistent with the pattern of action across the founders of a QTL. Of these,  
329 at 10 loci the peak GDS logP association was at least 90% of the peak SNP logP. Thus most  
330 QTLs are not likely to be caused by gene deletions. However, the GDS is based on empirical  
331 read coverage, and so is likely to be affected by stochastic experimental variations hence it is  
332 possible that the association at a true causal GDS might appear weaker than that of a tagging  
333 SNP. A further caveat is that deletions are always inferred relative to the reference genome  
334 of Chinese Spring, such that insertions or functional genes missing from the reference genome  
335 annotation will not be captured.

336

### 337 *Genomic Prediction*

338 We next performed phenotypic prediction all 55,067 tagging SNPs, to predict the potential  
339 for genetic improvement within the NDM. We trained genomic prediction models using three  
340 shrinkage methods: ridge regression (RR), least absolute shrinkage and selection operator  
341 (LASSO) and Elastic Nets (EN), using 50-fold cross-validation with randomly-selected training  
342 sets comprising 90% of RILs and test sets of the remaining 10%. LASSO and EN had almost  
343 identical prediction accuracies but EN included on average 26% more SNPs than LASSO  
344 (Supplementary Figure 5). Accordingly, we only report the LASSO results. LASSO prediction  
345 accuracies for all traits are shown in Figure 5b, alongside the proportion of heritable variation  
346 explained by QTLs (Figure 5a). Across traits, LASSO had higher average prediction accuracy  
347 than RR (Figure 5c), particularly for phenotypes where a larger fraction of variation can be  
348 explained by genome-wide significant QTLs (Figure 5d), as expected for a model selection  
349 method. LASSO prediction accuracies (correlation coefficients) varied from 0.13-1 (mean  
350 0.43) across phenotypes, using models with 1-465 SNPs (mean 155 SNPs). The number of  
351 SNPs in the LASSO model is higher for phenotypes where the overall heritability estimate  
352 greatly exceeds the fraction of variation that can be explained by genome-wide significant  
353 QTLs (Figure 5e).

354

355 Out-of-sample test set prediction confirms that polygenic LASSO SNPs have predictive power  
356 and are therefore likely to be tagging genetic variants affecting phenotypic variation. Most  
357 phenotypes are polygenic; their prediction models exhibited a mixture of a few large effect  
358 and many smaller effect loci. A typical example (for height) of the 193 non-zero LASSO SNP  
359 effects is shown in Figure 4c. In contrast, the Mendelian AWN phenotype is fully explained  
360 and predicted using a single genome-wide significant QTL.



361

362 The reduced accuracy of RR compared to the LASSO is expected in the absence of significant  
363 population structure. There will be reduced variation in kinship among RILs compared to the  
364 wider germplasm from which the founders are usually selected. Much of the prediction  
365 accuracy of RR results from exploiting kinship rather than from tagging causative variants[46]  
366 so there is less opportunity for high prediction accuracy in MAGIC populations. In these  
367 circumstances, a feature selection method such as the LASSO can more accurately identify  
368 and tag haplotypes contributing to trait variation and give greater prediction accuracies. The  
369 LASSO also accurately predicts traits determined predominantly by a few QTL of large effects,  
370 in which circumstances RR performs poorly (Figure 5d). The LASSO is therefore better for  
371 genomic prediction in MAGIC.

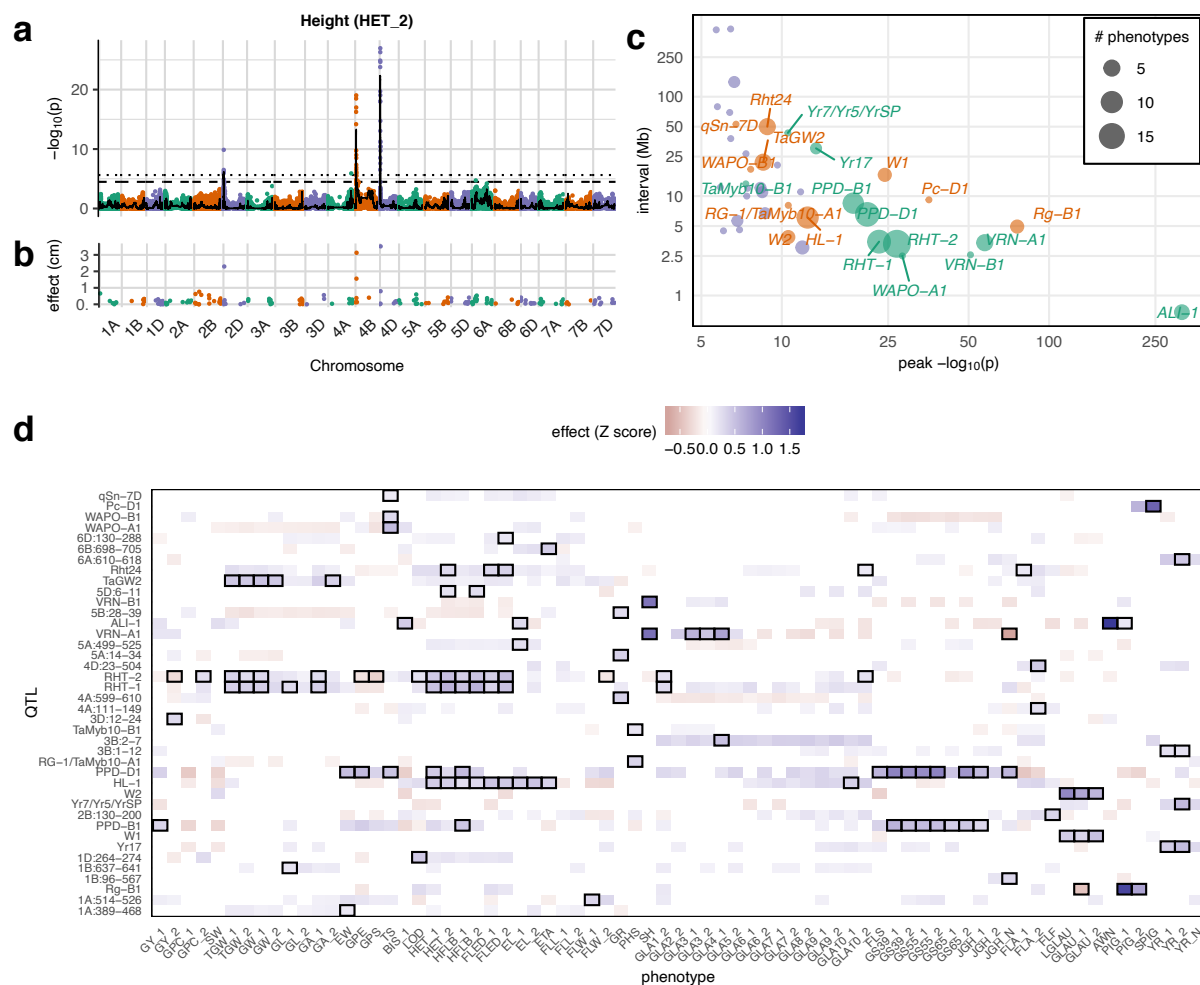

372

373 **Figure 4** Genotype-phenotype associations. (a) Exemplar Manhattan plot of the genome-wide  $-\log_{10} p$  values of  
 374 association ( $\log P$ ) between the height to ear tip phenotype from year 2 (HET\_2) and 55,067 LD-pruned SNP  
 375 dosages (dots) or founder haplotype dosages (line). The horizontal lines show the 5% genome-wide significance  
 376 thresholds for SNPs (dotted) and haplotypes (dashed). (b) The 193 non-zero estimated LASSO SNP effects for  
 377 HET\_2. (c) The 40 genomic locations where genome-wide significant SNP associations were found for at least  
 378 one phenotype, classified by effect size ( $\log P$ ; x-axis) and genomic interval width (Mb; y-axis). Each circle  
 379 represents one locus, and its size shows the number overlapping QTLs; the smallest interval width and p value is  
 380 shown where there are multiple overlapping phenotype associations. Labels indicate QTLs that colocalise with  
 381 previously described QTLs or candidate genes; green indicates high-confidence colocalization ( $n=11$ ) and purple  
 382 low-confidence colocalization ( $n=10$ ). (d) Pleiotropy across 40 loci: those loci without names are labelled by  
 383 chromosome and position in Mb) and 73 phenotypes. Shades indicates the significant ( $p<0.05$ ) locus phenotypic  
 384 effects expressed as the number of standard deviations (Z-score). Genome-wide significant QTLs are highlighted  
 385 with boxes.

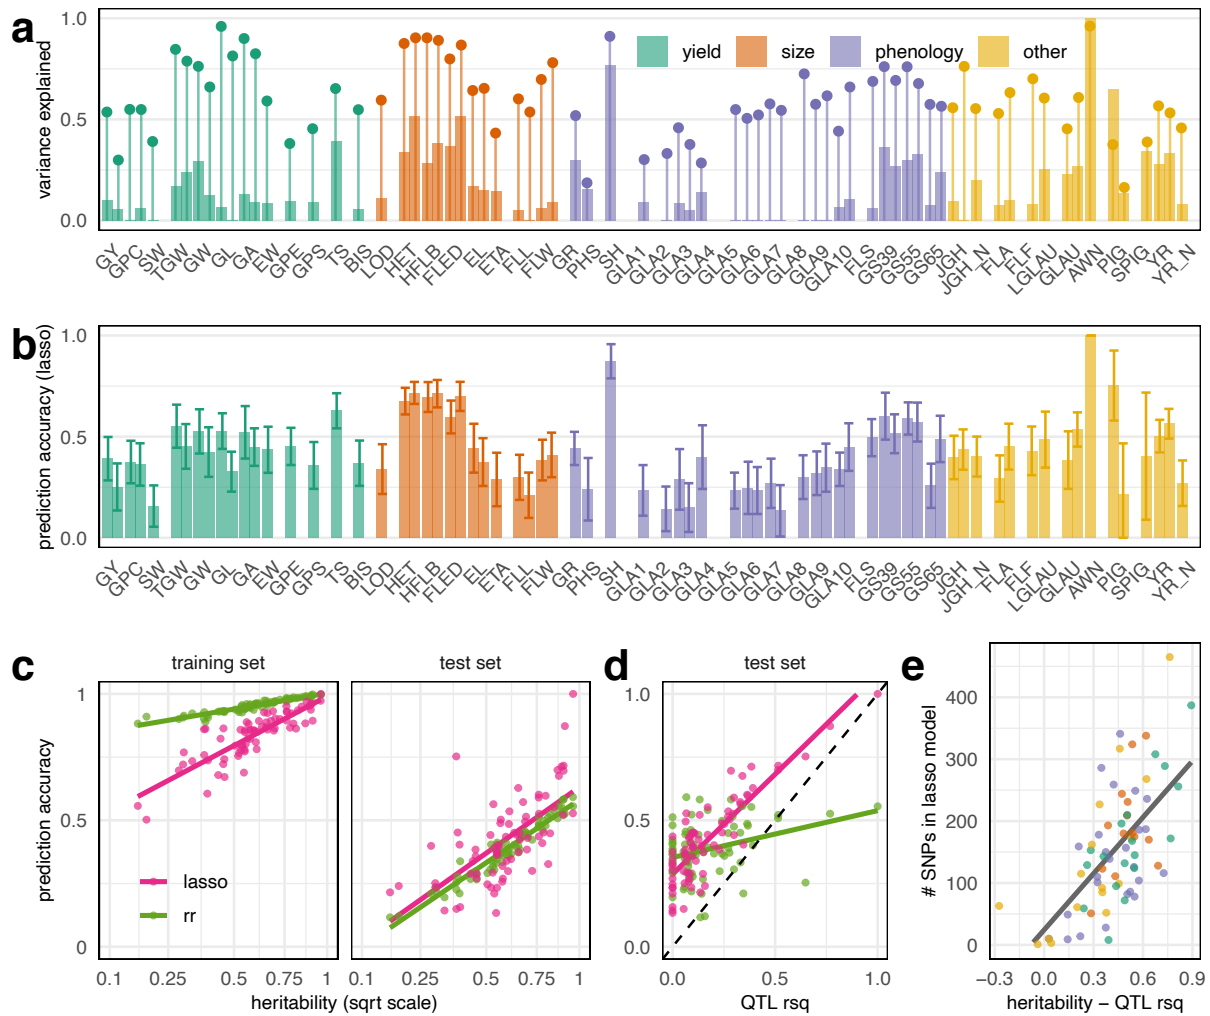

386

387 **Figure 5** Genetic architectures of 73 trait/year combinations (47 distinct traits) as revealed by QTL mapping and  
 388 genomic prediction. (a) Phenotypic variation explained by all genome-wide significant QTLs (thick bars) and by  
 389 the full SNP-based genetic relationship matrix (heritability, thin bars and dots). Phenotypes measured in year 1  
 390 and year 2 are paired, shifted to the left and right, respectively. (b) LASSO prediction accuracy (correlation  
 391 coefficients) across 50-fold cross validation; error bars show sds. (c) Prediction accuracy correlations (y-axis) and  
 392 sqrt(heritability) (x-axis) and in the test and training sets under ridge regression (rr) and LASSO genomic  
 393 prediction models. Prediction into the test set is generally higher with LASSO, especially for traits where more  
 394 variation is explained by genome-wide significant QTLs (d). (e) LASSO models usually include more SNPs when  
 395 more heritable variation is unaccounted by genome-wide significant QTLs (x-axis is difference between  
 396 heritability and QTL  $R^2$ ).

397 We used these genomic prediction models to explore the potential for selection in a much  
 398 larger simulated population of 20,160 MAGIC RILs, 40 times larger than the real population.  
 399 These were created by permuting the founder identities in the founder genome mosaics  
 400 inferred in the real RILs, preserving linkage through the genetic map. Phenotypes were  
 401 predicted for the test set of real RILs (10% of all lines) and in the simulated RILs for all 50  
 402 prediction models (training/test set jackknife resamples). Figure 6a shows, for two example

403 phenotypes, that the distribution of predicted phenotypes is almost identical in the real (test  
404 set) and simulated RILs. As expected, the most extreme predicted values (maximum and  
405 minimum) in the simulated RILs exceed those in the real dataset because novel allelic  
406 combinations are generated in the larger simulated population. However, the average  
407 improvement in extrema between the test set and simulated phenotype predictions is only -  
408 0.5 (for the minimum) and +0.68 standard deviations (for the maximum). This is in line with  
409 extreme-value distribution theory and shows that blind-breeding a very large population in  
410 the hope of generating novel combinations of beneficial alleles is inefficient.

411

412 Next, we predicted the theoretical extreme phenotypic values that it is possible to create  
413 from segregating variation if unlimited recombination were possible. That is, we computed  
414 the phenotypic prediction in an imaginary line that carries all the alleles predicted to  
415 increase/decrease each phenotype. For this exercise, we trained the prediction models on  
416 the full set of 504 RILs so they differ slightly from those used to predict phenotypes in the test  
417 set. In the test set and simulated RILs, the predicted phenotypic extremes generally reflect  
418 the population size, which determines the probability that a single line happens to sample  
419 many alleles with positive/negative effects. However, Figure 6b shows that the theoretical  
420 maximum/minimum phenotypic prediction is linearly related to the complexity of the LASSO  
421 model (i.e. the number of non-zero SNP coefficients in the model). This suggests that  
422 hundreds of loci would need to be selected over multiple generations to generate any large  
423 phenotypic shifts, in line with the decades of breeding that has been required to produce  
424 genetic gain.

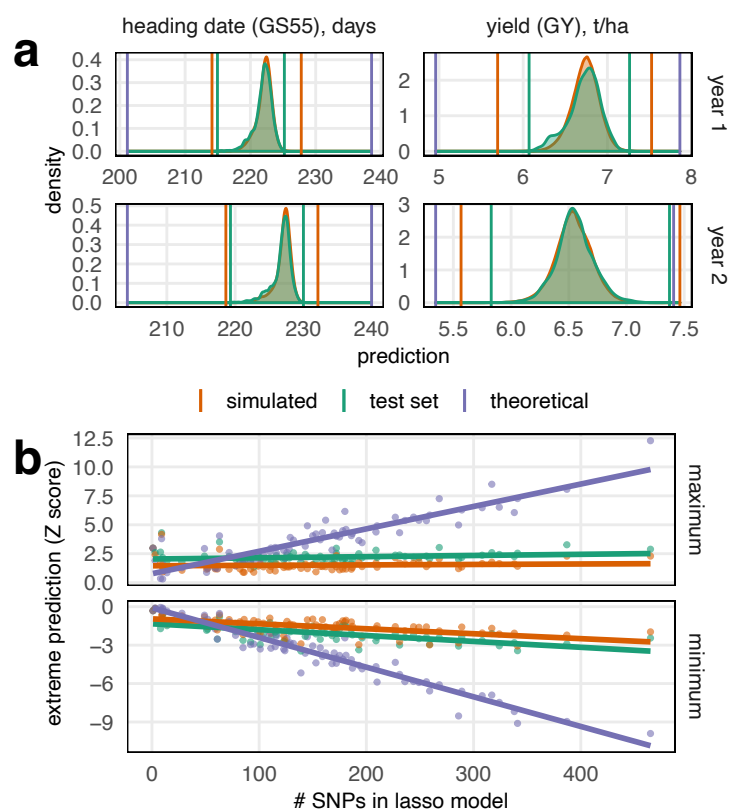

425

426 **Figure 6** Predicted potential for phenotypic change. (a) We predicted the phenotypes of real MAGIC recombinant  
 427 inbred lines, RILs (green distribution), and a large population of 20,160 simulated MAGIC RILs (orange  
 428 distribution). These distributions largely overlap but more combinations are made in the simulated dataset such  
 429 the the extreme values are more extreme. Nevertheless, the highest/lowest phenotypic prediction in the  
 430 simulated population of 20,000 is generally only ~0.5 standard deviations higher/lower than the trait predictions  
 431 in the real dataset of 504 lines. Upper graphs: predictions based on year 1 phenotype, lower graphs predictions  
 432 based on year 2 phenotype (b). We also estimated the extremes of the phenotype predictions that are possible  
 433 given the full lasso genomic prediction models (purple line in a). Large deviations from the current population  
 434 mean are predicted to be possible but only through the fixation of a large number of loci, with less potential for  
 435 change predicted at less-highly polygenic traits.

436 For essentially all crops where yield and yield quality are high priority traits, a trade-off is  
 437 evident between these two phenotypes and this is recognised as a longstanding problem in  
 438 wheat. Thus, identifying opportunities to break this trade-off is important[47,48]. We  
 439 estimate that yield has increased by 0.021 t ha<sup>-1</sup> year<sup>-1</sup> based on a regression of average yield  
 440 on founder release year (p=0.006, n=16, R<sup>2</sup>=0.43). The highest yields measured in founders  
 441 and RILs exceeds the maximum predicted yield from the genomic prediction models (Figure  
 442 6) due to shrinkage in estimating SNP effects. However, high grain yield (GY) is correlated with  
 443 low grain protein content (GPC) among the founders (Pearson's correlation coefficient -0.94,

444  $p < 0.001$ ,  $n = 16$ ), Figure 7. Founder genetic material is reshuffled without selection in the RILs,  
445 but the GY-GPC relationship continues (correlation  $-0.77$ ,  $p < 0.001$ ,  $n = 504$ ), suggesting some  
446 pleiotropy in the underlying genetic effects. To investigate the segregating genetic variation  
447 that may be available to break this trade-off, we analysed the deviation from the trend (PYD:  
448 distance from symmetrical Thiel-Sen regression between GPC and GY, after Z-score  
449 normalisation). The heritability for PYD was 0.41 in year one and 0.25 in year two and could  
450 be predicted with accuracy 0.26 (sd 0.11) in year one and 0.13 (sd 0.11) in year two. These  
451 estimates are lower than those for GY and GPC analysed separately (GY heritability 0.54 and  
452 0.30, prediction accuracy 0.39 and 0.25; GPC heritability 0.55 and 0.55, prediction accuracy  
453 0.375 and 0.36, Figure 5. PYD of the founders did not correlate with release date, but these  
454 results suggest modest potential to break the yield-protein trade off, requiring strong and  
455 targeted breeding effort[47,48].  
456

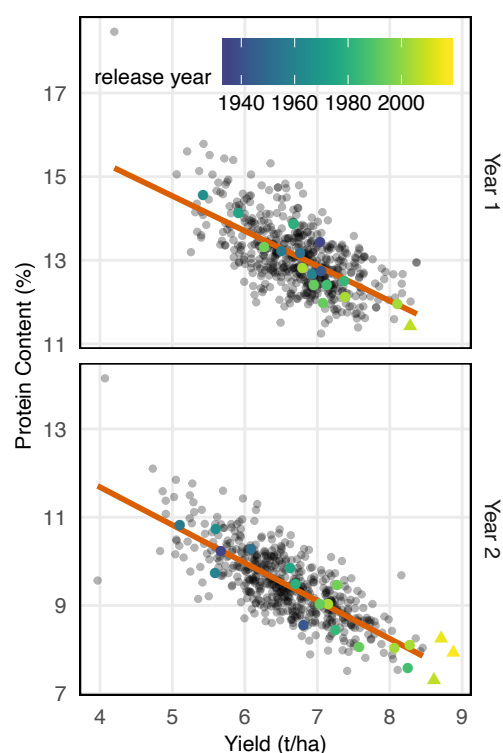

457

458 **Figure 7** Negative trade-off across two years between grain yield (GY; x-axis) and grain protein content (GPC; y-  
459 axis) in 504 NIAB DIVERSE MAGIC RILs, 16 founders, and 3 more recently developed varieties (triangles, only  
460 one measured in year 1).

## 461 Discussion

462 We report five main findings. First, imputation from low coverage WGS is a cost-effective and  
463 straightforward genotyping strategy for crops, at least in multiparental populations. Despite  
464 its large, repetitive and hexaploid genome, wheat genotypes can be reliably imputed from  
465 WGS with average per-sample coverage in the range of 0.075x-0.3x and without the use of  
466 reference panels[26]. Thus there is no absolute requirement to even know the identities of,  
467 let alone sequence, the population founders, although this may be desirable for other  
468 purposes such as pan-genome assembly and re-annotation[18,49]. In this study, we were  
469 able to impute genotypes and founder haplotypes at >1M SNP sites in >500 NDM RILs, which  
470 proved ample for genetic mapping and genomic prediction.

471

472 Second, based on SNPs called from exome capture, no more than three haplotypes segregate  
473 at most genes in commercial NW European bread wheats released since 1935. There appears  
474 to be little or no variation at about a quarter of genes on the A and B subgenomes, and at  
475 about half on the D subgenome. Complete re-assembly and re-annotation of the 16 founders  
476 of the NDM would yield more complete insights into the extent and impact of coding  
477 variation. Limits on haplotypic variation are probably the result of historical selection and  
478 population bottlenecks that reduced the effective population size before the onset of  
479 intensive breeding programmes[12,50], as well as the close relatedness among breeding  
480 materials in more recent wheat pedigrees[51]. However, it appears that the low overall level  
481 of genetic diversity has not been further reduced during the 20<sup>th</sup> Century[52,53].

482

483 Third, as a consequence, most QTLs are accounted for by bi-allelic SNPs rather than haplotype  
484 differences. For comparison, about 40% of QTLs identified in a multi-founder population of  
485 rats were attributed to multi-allelic/haplotypic effects[54]. Furthermore, most genome-wide  
486 significant QTLs had pleiotropic effects. Extensive pleiotropy suggests that naïve selection on  
487 one phenotype is likely to induce correlated responses in other phenotypes. In particular, we  
488 found improved yields in recent varieties has come at the cost of a decline in protein content  
489 (Figure 7; increasing yield by one t/ha reduces protein content by about 1%). Despite  
490 reshuffling haplotypes without selection, this trade-off continues in the NDM, which indicates  
491 directed selection would be required to break the yield-quality trade-off, potentially creating  
492 varieties with improved nitrogen use efficiency[55,56].

493

494 Fourth, across 47 phenotypes, we found a wide range of underlying genetic architectures. For  
495 traits such as awns, pigmentation, spring habit and yellow rust resistance, almost all of the



496 heritable phenotypic variance could be explained by one to four genome-wide significant  
497 QTLs (Figure 5). In other cases, a few loci with large phenotypic effects were accompanied by  
498 dozens of loci with smaller effects on traits such as flowering time and height (Figure 4a). The  
499 loci with very large effects have mostly been reported before (Figure 4b) because we  
500 recapitulate key historical steps such as the introduction of photoperiod sensitive and semi-  
501 dwarfing alleles from Japan[44,45]. Traits such as yield were polygenic with the majority of  
502 heritable variation coming from many loci of smaller effect (Figure 5).

503

504 Fifth, our genomic prediction models suggest that hundreds of loci will need to be selected  
505 and fixed to achieve large phenotypic changes in polygenic traits in the future (Figure 6B). We  
506 achieved reasonable prediction accuracy with modest numbers of SNPs; the mean out-of-  
507 sample prediction accuracy was 0.43, using on average only 155 SNPs per phenotype, out-  
508 performing ridge-regression which considers all markers simultaneously. Other crop and  
509 livestock studies have also found very sparse markers can be sufficient for useful genomic  
510 prediction[11,57,58]. Here, rather than using low marker densities, we trained models that  
511 select a few hundreds of markers from ~55k tagging SNPs. In part, this sparsity is a  
512 consequence of the design and construction of MAGIC populations, eliminating rare alleles  
513 and creating blocks of markers that can be easily tagged in prediction models[15]. These  
514 factors may be responsible for the use of far fewer markers than used to generate polygenic  
515 prediction scores in humans[59], where there is a long tail of rare variation and less linkage  
516 disequilibrium.

517

518 Our results suggest that dramatic genetic improvement over 70 years of breeding has largely  
519 been achieved through the fine shuffling of a low number of haplotypes to recombine

520 polygenic alleles of small effect, combined with the introduction of alien introgressions from  
521 wide crosses. The introgression of large genomic segments from related species has most  
522 commonly been for sources of resistance to specific diseases[9,33,34]. Breeders now have a  
523 choice whether to continue with the same strategy, i.e. selecting from within existing  
524 variation and introgressing selected exotic alleles, or to ambitiously expand the pool of  
525 available haplotype diversity genomewide.

526

## 527 **Methods**

### 528 *NDM Population Creation*

529 The 16 NDM founders were chosen to capture the greatest genetic diversity using  
530 PowerMarker genetic analysis software[60]. They were chosen from 94 NW European wheats  
531 released in the UK that were genotyped with 546 DArT and 61 SSR markers; the full panel also  
532 included 96 US and 50 Australian varieties, which were excluded based on STRUCTURE  
533 analysis[61]. The founder selection process was run iteratively with the varieties ‘Robigus’  
534 and ‘Soissons’ first fixed to be included to coincide with the founders of the 8-founder NIAB  
535 Elite MAGIC population[62]. Then the most frequently selected additional 4, then 9, and 12  
536 varieties were fixed in multiple iterative selection runs and finally the most frequently  
537 selected 16 were chosen. Seed for the founding varieties was sourced from the John Innes  
538 Centre Germplasm Resource Unit (GRU <http://www.jic.ac.uk/germplasm/>).

539

540 These founders were inter-crossed in a balanced funnel crossing scheme, based on a Latin  
541 square field trial design, over four generations to create 16-way crosses with all the founders  
542 equally represented in their pedigree. First, all 120 possible 2-way crosses between founders

543 were made in a half diallel scheme. Two-way plants were then crossed in 60 4-way  
544 combinations. Multiple plants from each family were used in crossing from 2-way onwards,  
545 in order to maintain maximum founder allelic diversity within the population. 30 crossing  
546 combinations were made between 4-way plants to create 8-way crosses, making between  
547 five and eight replicate crosses per combination using different plants. These were  
548 intercrossed in 15 combinations to create balanced 16-way crosses, with each combination  
549 replicated between six and fifteen times using different 8-way plants. This resulted in 174 16-  
550 way plants from which one to sixteen inbred lines per 16-way family were made through  
551 single seed descent (SSD). 596 RILs were advanced to the F<sub>7</sub> stage when seed for phenotyping  
552 was multiplied in 1x1m nursery plots. Supplementary Table 9 gives details the number of  
553 plants involved in each cross and Figure 2a shows the pedigree for the 504 RILs used in our  
554 main analysis only.

555

## 556 *Phenotyping*

557 RILs from the population were phenotyped in field trials over multiple environments near  
558 Cambridge, UK. Yield trials were conducted in the growing seasons 2016-2017 and 2017-2018,  
559 hereafter year 1 and year 2 (phenotype suffix codes \_1 and \_2). Information on location, soil  
560 type, key dates and inputs for both years are given in Supplementary Table 4. Yield plot  
561 dimensions were 2m wide and 4m long and plots were sown at a density aiming to achieve  
562 300 plants m<sup>-2</sup>. In year 1, 596 lines were included in two replicates, the sixteen founders in  
563 four replicates and the commercial control variety 'KWS Santiago' in 24 replicates in a  
564 randomised nested block design with 16 main blocks of 80 adjacent plots which comprised  
565 each row in the trial and eight sub-blocks of ten plots nested within each main block. In year  
566 2 trials, 596 lines and the 16 founders were included in two and four replicates respectively

567 but three control varieties ('KWS Santiago', 'Skyfall' and 'Shabras') were all included in four  
568 replicates. Plots were again randomised in a nested block design but including additional plots  
569 making a larger trial, consisting of 20 main blocks of 115 adjacent plots, which comprised each  
570 row, and 23 sub-blocks of five plots nested within each main block.

571 Disease observation trials (DOTs) were conducted near Cambridge, UK in the same years as  
572 the yield trials to assess resistance to crop diseases. These plots consisted of two 1.2m length  
573 rows, treated with no fungicide but otherwise standard inputs. Due to local conditions, DOTs  
574 were considered to have natural high pressure of yellow rust (*Puccinia striiformis* f.sp. *tritici*).  
575 In both years, DOTs included two replicates of 596 RILs, four replicates of the 16 founders and  
576 68 additional replicates of the susceptible founder 'Robigus'. Trial designs included two main  
577 blocks of 660 plots, with 11 sub-blocks of 60 plots nested within main blocks. All trial designs  
578 for both yield and disease observation trials were made using the package 'blocksdesign' in  
579 R. Phenotyping of some traits was also carried out in 1x1m seed nursery plots where lines  
580 were not replicated but the founders were in three replicates and randomised across the  
581 nurseries (phenotype code \_N).

582  
583 A wide range of traits were phenotyped across the field trials, including traits for crop  
584 developmental morphology, phenology, plant stature and canopy architecture, yield and  
585 yield components such as spike and grain morphology, disease resistance, pigmentation,  
586 plant glaucosity, indications of stress response, lodging, grain protein content and  
587 vernalisation requirement. A summary of these traits and abbreviations are presented in  
588 Table 1 and details of phenotyping methods are listed in Supplementary Table 5.

589

## 590 *Trials Analysis*

591 Adjusted phenotype values were calculated as Best Linear Unbiased Estimates (BLUEs) for  
592 each trait separately for each trial year using mixed effects models with ASRemL[63].  
593 Genotype was considered a fixed effect whilst experimental blocking structure as well as  
594 other covariates such as harvesting day, where relevant, were included as random effects.  
595 Spatial models including first- and second-order auto-regressive spatial models were also  
596 used. Model simplification was carried out where models with all possible combinations of  
597 random effect terms and spatial terms for row and column were run and the best fitting  
598 model was chosen based on Akaike Index Criteria (AIC). Model residuals were visually checked  
599 for normality and equal variance to fitted values distribution. Best Linear Unbiased Estimates  
600 (BLUEs) for all phenotypes for the 16 founders and for the 504 RILs used in our main analysis  
601 (see below) are provided in Supplementary Table 6. We used symmetrical Thiel-Sen  
602 regression (implemented in the 'deming' R package) after phenotype normalisation to  
603 characterise the relationship between protein content (GPC) and yield (GY). The Protein-Yield  
604 Deviation (PYD) phenotype is calculated as the Euclidian distance from this regression line.

605

## 606 *Genotyping Array Data*

607 All DNA extraction was performed using the Qiagen DNeasy Plant Kit on leaf tissue samples  
608 taken from emerging leaves of seedlings. First, genotyping was performed at the Bristol  
609 Genomics Facility using the Axiom 35k wheat breeders' array[12]. Initially, two 384-sample  
610 plates were genotyped. Seed from the plants used as founders were genotyped on each plate  
611 (32 samples) along with extra seed from the original varietal seed stock used (28 samples)  
612 and seed from founders propagated to 2017 (16 samples). In addition, 596 RILs were  
613 genotyped after 5 generations of selfing ( $F_6$ ). To account for genotyping failures and to ensure

614 the accuracy of sample labels, 150 RILs were re-genotyped in the F<sub>7</sub> generation along with a  
615 further replicate of each founder.

616

617 Genotype calling was performed using the Affymetrix Power Tools (v1.19) and SNPolisher R  
618 packages, following the recommended Axiom analysis pipeline. All samples except two-way  
619 crosses were given the standard inbreeding penalty, 4, which penalises calling heterozygous  
620 genotypes. Four samples failed the 'dish quality control' threshold (0.82) and a further 28  
621 samples with call rates were below 97% were excluded. Marker classifications were  
622 performed using "ps-classification", and ps-classification-Supplementary" functions with  
623 options --species-type polyploid --hom-ro false. All calls were adjusted using the standard  
624 0.025 confidence threshold using the Ps\_CallAdjust function.

625

626 Samples were compared to one another using the 14,935 markers classified as  
627 'PolyHighResolution' only. Overall, 46 RIL pairs were found to be >92% similar (mean 98.5%  
628 genotype similarity), where all other comparisons between MAGIC lines were, at most, 84%  
629 similar (mean 67.8%). These apparently duplicated genotypes could indicate genotyping,  
630 labelling, or propagation errors so only one RIL from each pair was used for sequencing (550  
631 RILs). To ensure pedigree accuracy, we chose the RIL in each pair that was genotypically most  
632 similar to other RILs derived from the same 16-way cross (i.e. in the same family).

633

### 634 *Sequencing Data*

635 For whole genome sequencing, DNA was extracted from 550 RILs at the F<sub>7</sub> generation. DNA  
636 for RILs that failed quality control were extracted again at the F<sub>8</sub> generation (n=50).  
637 Sequencing and library preparation was performed at Novogene, where libraries were

638 generated from 1.0 $\mu$ g DNA per sample using the NEBNext DNA Library Prep Kit. Sequencing  
639 was performed on a NovaSeq 6000 instrument (Illumina) to get at least 6Gb of raw sequence  
640 data (2x150bp paired end reads) per sample. One founder (Holdfast) was sequenced to 15.8x  
641 coverage using the same method.

642

643 The other founders were sequenced after capture using two recently designed probe sets  
644 targeting promoter and genic regions, respectively[21]. Capture was performed at the  
645 Earlham Institute following the SeqCap EZ Library SR v5.1 protocol (Roche NimbleGen Inc.,  
646 Madison, WI, USA) with 1 $\mu$ g of genomic DNA sheared to 300bp[21]. Four captures were  
647 performed using 8 samples per set (2x promoter captures and 2x genic captures). Samples for  
648 the founder Stetson were included on all four capture experiments so roughly double the  
649 sequence data was obtained for this variety (Supplementary Table 1). Sequencing with  
650 2x150bp reads was performed at the Earlham Institute on a NovaSeq 6000 instrument  
651 (Illumina) with 16 promoter capture libraries on one lane and 16 genic capture libraries on  
652 another lane.

653

#### 654 *Variant Calls and Imputation*

655 All reads were aligned to the bread wheat reference genome from cv. Chinese Spring (RefSeq  
656 v1.0)[27] using bwa-mem (version 0.7.12)[64] and sorted using samtools (version 1.3.1)[65],  
657 which was also used to calculate coverage. For compatibility with the bam file format, we split  
658 each chromosome in the reference genome at the halfway point before alignment. We called  
659 variants from the founder sequences within the high confidence gene, promoter and 5' UTR  
660 regions targeted by the capture probes[21] using GATK (version 4.0.8.0)[66] HaplotypeCaller  
661 and GenotypeGVCFs (options --interval-padding 100 --minimum-mapping-quality 30). We

662 used vcftools (version 0.1.15) to include only bi-allelic single nucleotide polymorphisms  
663 (SNPs) with average coverage depth between 5 and 60 (all per sample coverages between 2  
664 and 120) and no missing calls. We also filtered with bcftools (version 1.2)[67] using standard  
665 quality control options `--exclude 'QD<2 || FS>60.0 || MQRankSum<-12.5 ||`  
666 `ReadPosRankSum<-8.0 || SOR>3.0 || MQ<40'`. This left 1.78M SNPs, of which we only use  
667 the 1.13M sites with no heterozygous calls (`--genotype ^het` option) for our main analyses.

668  
669 We first called genotypes in the RILs at these 1.13M SNP sites directly using GATK  
670 HaplotypeCaller in GENOTYPE-GIVEN-ALLELES mode, using the same options as above. We  
671 assessed the concordance between array genotypes and these direct calls (AD) at overlapping  
672 sites (see below). For 10 RILs, the directly called sequencing variants most closely matched  
673 genotyping array data for a different line than expected. These were excluded because the  
674 source of the discrepancy (sequence data or array data) cannot be established. The  
675 concordance between our genotyping array data and direct calls (AD) was below 95% for a  
676 further 36 RILs, which were excluded (mean AD 84.7% for removed lines), leaving 504 RILs.  
677 We estimated heterozygosity in these 504 RILs using only genotypes called from at least four  
678 reads. Of 2.6M such genotype calls, only 0.67% were called as heterozygotes.

679  
680 We imputed genotypes at the 1.13M SNP sites using the alignments and STITCH software  
681 (version 1.5.7)[26]. Because alignments were to a reference genome with chromosomes split  
682 in half, we first ran STITCH with the `generateInputOnly` option, and then joined the input files  
683 for each chromosome half before imputation. For all runs, we used the parameters `nGen=3,`  
684 `minRate=0.001, bqFilter=30, method='diploid-inbred'` and then filtered all sites with an `info`  
685 score below 0.4, minor allele frequency below 2.5%, or missingness above 10%. For our main



686 analysis, we used the genotype calls in the founders as a reference panel and outputted the  
687 estimated ancestry dosages of each founder at each position in each RIL using the  
688 `outputHaplotypeProbabilities` and `output_haplotype_dosages` options. When using the  
689 founders as a reference panel, we removed options that estimate and update the haplotypes  
690 in the population (`shuffleHaplotypeIterations`, `reference_shuffleHaplotypeIterations`,  
691 `refillIterations`). To test accuracy when reference panels aren't available, we re-ran  
692 imputation without the founder haplotypes, using 40 iterations to estimate the haplotype  
693 space and recombination mosaics. We also used the `downsampleFraction` option to randomly  
694 sample a fraction of alignments with/without using the founder reference panel. Finally, we  
695 tested imputation accuracy (without a reference panel), when fewer than sixteen haplotypes  
696 were assumed to segregate in the population by varying the K parameter (Supplementary  
697 Figure 2).

698

### 699 *Genotype Comparisons*

700 For comparison against the sequencing dataset, we used all genotyping array markers.  
701 Replicates of founders and MAGIC RILs (where available) were used to make a consensus call  
702 where the most common genotype across replicates was taken as the consensus and only  
703 retained when more than 50% of the non-missing calls were in agreement. In addition,  
704 markers where one homozygous genotype was missing from all RILs were converted such that  
705 all heterozygous calls were assumed to be in the missing homozygous class. The failure to  
706 detect a homozygous class is likely to be a result of polyploidy, which can reduce  
707 differentiation between the three genotype classes and make them hard to distinguish.  
708 Finally, to get plausible physical positions for the genotyped markers, BLASTn v2.2.30[25] was  
709 used to compare the 75bp probe sequences ([cerealsdb.uk.net](http://cerealsdb.uk.net))[12] against the reference

710 genome[27]. When matching the SNP array data with the sequenced SNPs, array sites were  
711 excluded if there had missing or heterozygous founder calls or if the genotypes and targeted  
712 SNP alleles did not match the founder sequence data. We found 5,877 sites that overlapped  
713 between the genotyping array data and the sequencing data (Supplementary Table 2).

714

715 To compare against global wheat diversity, we called founder genotypes at 113,457  
716 genotyping array sites that were polymorphic among 4,506 diverse global wheat  
717 accessions[13]. We called genotypes from alignments with mapping quality scores of at least  
718 30 using GATK HaplotypeCaller in EMIT\_ALL\_SITES mode with the `-emit-ref-confidence`  
719 `BP_RESOLUTION` option, providing a bed file of the 113,139 genotyping array sites[13]. We  
720 only considered sites where genotypes could be called in all 16 founders (n=56,063). We used  
721 genotyping array calls for cv. Chinese Spring to determine reference/non-reference alleles on  
722 the genotyping array, ignoring sites called as heterozygous (n=109) or missing (n=306) in  
723 Chinese Spring. Seven of the MAGIC founders were also present in the global genotype set  
724 (Brigadier, Copain, Maris Fundin, Soissons, Spark, Steadfast, Stetson)<sup>7</sup>. The average  
725 concordance of the global genotype calls and our sequencing calls for these founders was  
726 94.3% (sd 0.63%). We excluded 5,491 (9.8%) sites that had mismatches across these founders,  
727 many of which are likely to reflect differences in the underlying genetic variation picked up  
728 by the different genotyping technologies. Two other founder variety names were in the  
729 genotyping array dataset<sup>7</sup> (Banco and Holdfast) but the genotyping calls did not match  
730 (concordances 74.2% and 71.4%, respectively), which may reflect differences in the seed  
731 stock used.

732

### 733 *Founder Haplotype Diversity*

734 First, we used the SNPs called within each promoter-gene pair to estimate haplotypic diversity  
735 of the founders. We calculated absolute (Manhattan) pairwise genetic distances between  
736 founders at each site and then used complete linkage clustering to define haplotypic groups  
737 using `dist` and `hclust` functions implemented in R statistical software (version 3.6.0)[68]. This  
738 was repeated using different similarity thresholds to define haplotypes. Second, we  
739 determined haplotype breakpoints using a dynamic programming algorithm. For each  
740 pairwise founder combination, our algorithm calculates a mosaic of genotypic  
741 similarity/dissimilarity akin to the Viterbi path from a hidden Markov model. Genotype  
742 matches and mismatches are allocated a score (1 by default). To prevent excessive switching  
743 between states, there is also a 'transition penalty' for inferring a change between matching  
744 and mismatching states. Based on their pairwise matching/mismatching states, we then infer  
745 the total number of haplotypes inferred at each site. We repeat this procedure with different  
746 parameter choices (Supplementary Figure 2).

747

### 748 *Genetic Mapping and Heritability*

749 For mapping, we used the full set of 1,065,185 high-quality SNP sites called in 504 RILs after  
750 imputation and quality control filters. We also selected a subset of 55,067 SNPs such that  
751 every other SNP was tagged at  $R^2 > 0.99$  by a member of the subset using PLINK (version 1.90)  
752 with option `--indep-pairwise 500 10 0.99`. These tagging SNPs were used to calculate the  
753 genetic relationship matrix  $\mathbf{K} = \mathbf{G}\mathbf{G}'/p$ . The phenotypic variance-covariance matrix for a  
754 given vector  $\mathbf{y}$  of standardised phenotype values was modelled as  $\mathbf{V} = \mathbf{K}\sigma_g^2 + \mathbf{I}\sigma_e^2$  where

755  $\sigma_g^2, \sigma_e^2$  are the additive genetic and environmental variance components, estimated by  
756 maximum-likelihood[69]. The heritability of a trait was defined as  $h^2 = \sigma_g^2 / (\sigma_g^2 + \sigma_e^2)$ . The  
757 matrix square root of the variance matrix was calculated by eigendecomposition of  $V$  as  $A^2 =$   
758  $V$ , and the mixed model transformation of the data performed i.e.  $y \rightarrow A^{-1}y, G \rightarrow$   
759  $A^{-1}G, V \rightarrow I$  to remove the inflationary effects of unequal relatedness on genetic  
760 associations before association mapping.

761

762 We performed association tests at the level of both SNPs and founder haplotypes using R  
763 statistical software (version 3.6.0)[68]. Initially, we tested the null hypothesis of no  
764 association at each SNP site in the tagging set (~55k sites). We then determined genome-wide  
765 thresholds for statistical significance using 1,000 permutations on the transformed  
766 phenotypes. If any association exceeded the 0.05 threshold (smaller p value than found across  
767 at least 950 phenotypic permutations), then we repeated the association test at all of the  
768 ~1.1M SNPs on the chromosome with the strongest association signal (lowest p value).  
769 Mapping intervals were defined to include SNPs surrounding the peak SNP, with  $\log_{10}(p)$   
770 values within  $d$  units of  $x$  using  $d = \max \{2, 0.1x\}$  where  $x$  is the peak  $\log_{10}(p)$  value. The  
771 interval for haplotype-based tests includes the range of sites that have  $\log_{10}(p)$  values within  
772  $d$  units of  $x$ . SNP-based intervals were calculated using the same measure but then extended  
773 by the minimum of 5Mb or the distance to the next SNP in either direction that the same  
774 ‘strain distribution pattern’[54] as any highly-associated SNPs (SNPs with  $\log_{10}(p)$  values  
775 within  $d$  units of  $x$ ). The ‘strain distribution pattern’ is the pattern of major/minor alleles  
776 across founders. This procedure is designed to capture the uncertainty in the positioning of  
777 relevant recombination events either side of the QTL peak. We fitted QTLs in a stepwise  
778 manner by fitting the phenotype against the most strongly associated SNP (or haplotype

779 dosage) whenever genomewide significant QTLs were detected. The above association test  
780 procedure was then repeated using the phenotype residuals after fitting all previously  
781 identified QTLs. This allows closely-linked QTLs to be detected when they have different  
782 patterns of causal variants among RILs. Where QTL associations were found for different  
783 genotypes, they were judged to be at the same locus if they had overlapping mapping  
784 intervals and at least one matching strain distribution pattern at highly-associated SNP sites.

785

### 786 *Genomic Prediction*

787 To evaluate the accuracy of trait prediction within our magic population and estimate the  
788 extent of polygenic variation beyond genomewide significant QTLs, we conducted genomic  
789 prediction across all phenotypes using three shrinkage-based methods: ridge regression (RR),  
790 Elastic Nets (EN) and least absolute shrinkage and selection operator (LASSO). We note that  
791 with appropriate choice of ridge parameter  $\lambda = \sigma_e^2 / \sigma_g^2$ , RR is equivalent to a mixed model in  
792 the sense that the RR estimated SNP effects are identical to the mixed-model Best Linear  
793 Unbiased Predictors (BLUPs)[70,71]. This explains the linear correlation between estimates of  
794 heritability and RR prediction accuracy (Figure 5c). For each method, we conducted 50 rounds  
795 of cross validation by randomly sampling 90% of the RILs (n=454) as a training set in each  
796 round to train the model, which was then used to predict the remaining 10% of RILs (n=50) -  
797 the test set. For the three methods, the model equation can be written generally as  $y = \mu +$   
798  $\beta G + \varepsilon$ , where  $y$  is the estimated trait value,  $\mu$  is the model intercept,  $\beta$  is the vector of SNP  
799 effects,  $G$  is the genotype dosage matrix, and  $\varepsilon$  is the residual error.

800

801 The genomic prediction models were trained using the R package glmnet[72], which  
802 estimates an optimal lambda shrinkage value for all three genomic prediction methods based

803 on the training set. We then predicted phenotypes in the test set by multiplying all SNP  
804 coefficients estimates by their corresponding genotypes in the test set (and adding the  
805 intercept term). We report the training and test set prediction accuracy as the mean Pearson  
806 correlation coefficient of the predicted trait values and the actual phenotype values over 50  
807 rounds of cross validation.

808

809 We used these genomic prediction models to simulate the potential for phenotypic change.  
810 First, we permuted the population founder haplotypes identities 40 times across 504 RILs and  
811 then projected the permuted founder genotypes onto the new lines. This creates new genetic  
812 combinations while retaining the genetic map and linkage found in the real population. We  
813 then used the three models trained as described above to predict phenotypes for the  
814 simulated MAGIC RILs. We further calculated the theoretical maximum and minimum  
815 phenotype values that are possible given the genomic prediction models and the variants  
816 segregating in the population. To estimate the maximum and minimum potentially achievable  
817 phenotype values, we trained new genomic prediction models using the full data set of 504  
818 RILs for all phenotypes. We then calculated the maximum/minimum predicted phenotypes  
819 by summing the estimated effects for all positive/negative SNP coefficients.

820

### 821 *Gene Deletion Analysis*

822 We examined the power of gene-level coverage variation among founders to explain  
823 phenotypic variation. In each founder  $f$  and at each gene feature  $g$ , we computed a deletion  
824 index  $D_{gf}$  based on the number of reads aligning to the associated capture sequences,  
825 normalised by the overall coverage for that founder. The gene deletion score (GDS) for each  
826 MAGIC RIL  $i$  and feature  $j$  was computed as  $S_{ij} = \sum_f H_{ijf} D_{jf}$ , where  $H_{ijf}$  is the haplotype

827 dosage for founder  $f$  in RIL  $i$  at gene  $j$ , as computed by STITCH. For each phenotype a mixed-  
828 model GWAS was performed, using the GDS in place of SNP dosages and with a genetic  
829 relationship matrix computed from the GDS (Supplementary Table 8). We also repeated the  
830 genomic prediction analysis described above by replacing the SNP genotype dosage matrix  
831 with the GDS matrix (Supplementary Figure 5).

832

### 833 *Introgressions*

834 The presence of introgressions were determined using summary statistics (coverage, non-  
835 reference allele frequency in founders and RILs) calculated in 10Mb windows moved in 5Mb  
836 steps. Within introgressions, carriers have a high proportion of non-reference alleles due to  
837 the alignment of inter-specific genetic material to the bread wheat reference genome. The  
838 introgression extent was determined as the extent of 10Mb windows where all introgression  
839 carriers had a higher proportion of non-reference alleles than all non-carriers. Within these  
840 regions, we then checked the relative coverage of carriers and the extent to which the alleles  
841 of carriers are over- or under-represented among the RILs. This evidence is summarised in  
842 Supplementary Table 3. For example, the founder Maris Fundin carries a large introgression  
843 (640Mb) from *Triticum timopheevi* on chromosome 2B that inflates the total number of SNPs  
844 called on chromosome 2B, relative to the other chromosomes (Supplementary Figure 1), this  
845 introgression is substantially over-represented among RILs, as expected[34].

846

### 847 *Acknowledgements*

848 The initiation of the NIAB DIVERSE MAGIC (NDV) population was funded by Biotechnology  
849 and Biological Sciences Research Council (BBSRC) grant BB/E007201/1, awarded to IM.

850 Completion of the population, and its phenotypic and genetic analysis was funded by grants  
851 BB/M011666/1 to JC and BB/M011585/1 to RM, with some interim NDV germplasm  
852 development advancement supported by grant BB/I002561/1. Genomic prediction analyses  
853 were supported by grant BB/P024726/1 to RM. The small-plant phenotyping at IBERS was  
854 funded by BB/M011666/1 with additional support from BBSRC National Capability Grant  
855 BB/CAP1730/1. We thank Ana Sanchez and the temporary staff at NIAB who contributed to  
856 phenotypic data collection, and the NIAB Trials Team for management of field trial sites.  
857

### 858 *Author Contributions*

859 Project conception and funding: IM, PH (BB/E007201/1) and RM, JC (BB/M011666/1,  
860 BB/M011585/1). Project management: JC, RM, with input from MS, NF, PH, KG and AB.  
861 Population design IM, PH. Population creation: RH, NF. Seed preparation for trials,  
862 phenotyping, trials analysis and DNA extraction: NF. Small plant phenotyping: FC. Promoter-  
863 gene capture pull downs and library preparation: TB. Genetic analyses: MS with support from  
864 RM. Genomic prediction: OL. Manuscript writing: MS, OL, NF, RM, with inputs from KG, IM  
865 and JC. All authors edited and approved the manuscript.

866

### 867 *Availability of data and materials*

868 The sequence datasets supporting the conclusions of this article are available in the ENA  
869 repository, under project number PRJEB39021 (temporarily embargoed),  
870 <https://ebi.ac.uk/ena> .

871



872 The Genotyping array genotypes for founders and MAGIC RILs are available from  
873 <http://mtweb.cs.ucl.ac.uk/mus/www/MAGICdiverse/index.html> in text tabular format.

874

875 The Imputed SNP genotypes and founder haplotype dosages are available from  
876 [mtweb.cs.ucl.ac.uk/mus/www/MAGICdiverse/MAGIC\\_diverse\\_FILES/MAGIC\\_PLINK.tar.gz](http://mtweb.cs.ucl.ac.uk/mus/www/MAGICdiverse/MAGIC_diverse_FILES/MAGIC_PLINK.tar.gz),

877 and

878 [mtweb.cs.ucl.ac.uk/mus/www/MAGICdiverse/MAGIC\\_diverse\\_FILES/MAGIC\\_HAPLOHAPLO.](http://mtweb.cs.ucl.ac.uk/mus/www/MAGICdiverse/MAGIC_diverse_FILES/MAGIC_HAPLOHAPLO.tar.gz)  
879 [tar.gz](http://mtweb.cs.ucl.ac.uk/mus/www/MAGICdiverse/MAGIC_diverse_FILES/MAGIC_HAPLOHAPLO.tar.gz) (temporary links).

880

881 The remaining datasets supporting the conclusions of this article are included within the  
882 article and its additional files.

883

884 Custom analysis scripts (mixed model and haplotype dynamic programming algorithm) are  
885 available from [github.com/michaelfscott/DIVERSE\\_MAGIC\\_WHEAT](https://github.com/michaelfscott/DIVERSE_MAGIC_WHEAT).

## 886 References

887 1. FAO. Crop harvested area (yield and production). Crop Harvest. area (yield Prod. GAEZ.  
888 2014.

889 2. Tester M, Langridge P. Breeding technologies to increase crop production in a changing  
890 world. *Science* (80- ). 2010;327:818–22.

891 3. Brancourt-Hulmel M, Doussinault G, Lecomte C, Bérard P, Le Buenec B, Trottet M. Genetic  
892 Improvement of Agronomic Traits of Winter Wheat Cultivars Released in France from 1946  
893 to 1992. *Crop Sci.* 2003;43:37–45.

894 4. Shearman VJ, Sylvester-Bradley R, Scott RK, Foulkes MJ. Physiological processes

- 895 associated with wheat yield progress in the UK. *Crop Sci.* 2005;45:175–85.
- 896 5. Sanchez-Garcia M, Royo C, Aparicio N, Martín-Sánchez JA, Álvaro F. Genetic improvement  
897 of bread wheat yield and associated traits in Spain during the 20th century. *J Agric Sci.*  
898 2013;151:105–18.
- 899 6. Mackay I, Horwell A, Garner J, White J, McKee J, Philpott H. Reanalyses of the historical  
900 series of UK variety trials to quantify the contributions of genetic and environmental factors  
901 to trends and variability in yield over time. *Theor Appl Genet.* 2011;122:225–38.
- 902 7. IWGSC. Shifting the limits in wheat research and breeding using a fully annotated  
903 reference genome. *Science [Internet]*. 2018;361:eaar7191. Available from:  
904 <http://science.sciencemag.org/content/361/6403/eaar7191>
- 905 8. Adamski NM, Borrill P, Brinton J, Harrington SA, Marchal C, Bentley AR, et al. A roadmap  
906 for gene functional characterisation in crops with large genomes: Lessons from polyploid  
907 wheat. *Elife.* 2020;9:1–30.
- 908 9. Cheng H, Liu J, Wen J, Nie X, Xu L, Chen N, et al. Frequent intra- and inter-species  
909 introgression shapes the landscape of genetic variation in bread wheat. *Genome Biol.*  
910 *Genome Biology*; 2019;20:1–16.
- 911 10. He F, Pasam R, Shi F, Kant S, Keeble-Gagnere G, Kay P, et al. Exome sequencing  
912 highlights the role of wild-relative introgression in shaping the adaptive landscape of the  
913 wheat genome. *Nat Genet [Internet]*. Springer US; 2019;51:896–904. Available from:  
914 <http://dx.doi.org/10.1038/s41588-019-0382-2>
- 915 11. Juliana P, Poland J, Huerta-Espino J, Shrestha S, Crossa J, Crespo-Herrera L, et al.  
916 Improving grain yield, stress resilience and quality of bread wheat using large-scale  
917 genomics. *Nat Genet [Internet]*. Springer US; 2019;51:1530–9. Available from:  
918 <http://dx.doi.org/10.1038/s41588-019-0496-6>

- 919 12. Winfield MO, Allen AM, Burrridge AJ, Barker GLA, Benbow HR, Wilkinson PA, et al. High-  
920 density SNP genotyping array for hexaploid wheat and its secondary and tertiary gene pool.  
921 *Plant Biotechnol J.* 2016;14:1195–206.
- 922 13. Balfourier F, Bouchet S, Robert S, DeOliveira R, Rimbert H, Kitt J, et al. Worldwide  
923 phylogeography and history of wheat genetic diversity. *Sci Adv.* 2019;5.
- 924 14. Hufford MB, Berny Mier Y Teran JC, Gepts P. Crop Biodiversity: An Unfinished Magnum  
925 Opus of Nature. *Annu Rev Plant Biol.* 2019;70:727–51.
- 926 15. Voss-Fels KP, Stahl A, Wittkop B, Lichthardt C, Nagler S, Rose T, et al. Breeding improves  
927 wheat productivity under contrasting agrochemical input levels. *Nat Plants* [Internet].  
928 Springer US; 2019;5:706–14. Available from: <http://dx.doi.org/10.1038/s41477-019-0445-5>
- 929 16. Huang BE, Verbyla KL, Verbyla AP, Raghavan C, Singh VK, Gaur P, et al. MAGIC  
930 populations in crops: current status and future prospects. *Theor Appl Genet.* 2015;128:999–  
931 1017.
- 932 17. Cavanagh C, Morell M, Mackay I, Powell W. From mutations to MAGIC: resources for  
933 gene discovery, validation and delivery in crop plants. *Curr Opin Plant Biol.* 2008/02/26.  
934 2008;11:215–21.
- 935 18. Scott MF, Ladejobi O, Amer S, Bentley AR, Biernaskie J, Boden SA, et al. Multi-parent  
936 populations in crops: a toolbox integrating genomics and genetic mapping with breeding.  
937 *Heredity (Edinb).* *Heredity (Edinb)*; 2020;
- 938 19. Ladejobi O, Elderfield J, Gardner KA, Gaynor RC, Hickey J, Hibberd JM, et al. Maximizing  
939 the potential of multi-parental crop populations. *Appl Transl genomics. Appl Transl Genom*;  
940 2016;11:9–17.
- 941 20. White J, Law JR, MacKay I, Chalmers KJ, Smith JSC, Kilian A, et al. The genetic diversity of  
942 UK, US and Australian cultivars of *Triticum aestivum* measured by DArT markers and

- 943 considered by genome. *Theor Appl Genet.* 2008;116:439–53.
- 944 21. Gardiner LJ, Brabbs T, Akhunov A, Jordan K, Budak H, Richmond T, et al. Integrating  
945 genomic resources to present full gene and putative promoter capture probe sets for bread  
946 wheat. *Gigascience.* Oxford University Press; 2019;8:1–13.
- 947 22. IWGSC. A chromosome-based draft sequence of the hexaploid bread wheat ( *Triticum*  
948 *aestivum* ) genome Ancient hybridizations among the ancestral genomes of bread wheat  
949 Genome interplay in the grain transcriptome of hexaploid bread wheat Structural and  
950 functional pa. *Science* [Internet]. 2014;345:1250092. Available from:  
951 <http://www.sciencemag.org/content/345/6194/1250092.abstract>
- 952 23. Kover PXPX, Valdar W, Trakalo J, Scarcelli N, Ehrenreich IMIMM, Purugganan MDMDD,  
953 et al. A Multiparent Advanced Generation Inter-Cross to fine-map quantitative traits in  
954 *Arabidopsis thaliana*. *Plos Genet.* 2009/07/14. 2009;5:e1000551.
- 955 24. Gan X, Stegle O, Behr J, Steffen JGG, Drewe P, Hildebrand KLL, et al. Multiple reference  
956 genomes and transcriptomes for *Arabidopsis thaliana*. *Nature.* 2011/08/30. 2011;477:419–  
957 23.
- 958 25. Camacho C, Coulouris G, Avagyan V, Ma N, Papadopoulos J, Bealer K, et al. BLAST+:  
959 Architecture and applications. *BMC Bioinformatics.* 2009;10:1–9.
- 960 26. Davies RW, Flint J, Myers S, Mott R. Rapid genotype imputation from sequence without  
961 reference panels. *Nat Genet.* 2016;48:965–9.
- 962 27. IWGSC. Shifting the limits in wheat research and breeding using a fully annotated  
963 reference genome. *Science.* 2018;361:eaar7191.
- 964 28. Cavanagh CR, Chao S, Wang S, Huang BE, Stephen S, Kiani S, et al. Genome-wide  
965 comparative diversity uncovers multiple targets of selection for improvement in hexaploid  
966 wheat landraces and cultivars. *Proc Natl Acad Sci U S A.* *Proc Natl Acad Sci U S A*;

- 967 2013;110:8057–62.
- 968 29. Broman KW. The genomes of recombinant inbred lines. *Genetics*. 2005;169:1133–46.
- 969 30. Pont C, Leroy T, Seidel M, Tondelli A, Duchemin W, Armisen D, et al. Tracing the ancestry  
970 of modern bread wheats. *Nat Genet* [Internet]. Springer US; 2019;51:905–11. Available  
971 from: <http://dx.doi.org/10.1038/s41588-019-0393-z>
- 972 31. Rhoné B, Raquin AL, Goldringer I. Strong linkage disequilibrium near the selected Yr17  
973 resistance gene in a wheat experimental population. *Theor Appl Genet*. 2007;114:787–802.
- 974 32. Martynov SP, Dobrotvorskaya T V., Krupnov VA. Analysis of the Distribution of Triticum  
975 timopheevii Zhuk. Genetic Material in Common Wheat Varieties (*Triticum aestivum* L.). *Russ*  
976 *J Genet*. 2018;54:166–75.
- 977 33. Villareal RL, Toro E, Mujeeb-Kazi A, Rajaram S. The 1BL/1RS chromosome translocation  
978 effect on yield characteristics in a *Triticum aestivum* L. cross. *Plant Breed*. John Wiley &  
979 Sons, Ltd; 1995;114:497–500.
- 980 34. Tsilo TJ, Jin Y, Anderson JA. Diagnostic Microsatellite Markers for the Detection of Stem  
981 Rust Resistance Gene *Sr36* in Diverse Genetic Backgrounds of Wheat. *Crop Sci*. John Wiley &  
982 Sons, Ltd; 2008;48:253–61.
- 983 35. Gardner KA, Wittern LM, Mackay IJ. A highly recombined, high-density, eight-founder  
984 wheat MAGIC map reveals extensive segregation distortion and genomic locations of  
985 introgression segments. *Plant Biotechnol J*. 2016;14:1406–17.
- 986 36. Robert O, Abelard C, Dedryver F. Identification of molecular markers for the detection of  
987 the yellow rust resistance gene Yr17 in wheat. *Mol Breed*. 1999;5:167–75.
- 988 37. Marchal C, Zhang J, Zhang P, Fenwick P, Steuernagel B, Adamski NM, et al. BED-domain-  
989 containing immune receptors confer diverse resistance spectra to yellow rust. *Nat Plants*  
990 [Internet]. Springer US; 2018;4:662–8. Available from: <http://dx.doi.org/10.1038/s41477->

- 991 018-0236-4
- 992 38. Xu D, Wen W, Fu L, Li F, Li J, Xie L, et al. Genetic dissection of a major QTL for kernel  
993 weight spanning the Rht-B1 locus in bread wheat. *Theor Appl Genet* [Internet]. Springer  
994 Berlin Heidelberg; 2019;132:3191–200. Available from: [https://doi.org/10.1007/s00122-](https://doi.org/10.1007/s00122-019-03418-w)  
995 019-03418-w
- 996 39. Zhang M, Gao M, Zheng H, Yuan Y, Zhou X, Guo Y, et al. QTL mapping for nitrogen use  
997 efficiency and agronomic traits at the seedling and maturity stages in wheat. *Mol Breed.*  
998 *Molecular Breeding*; 2019;39.
- 999 40. Kuzay S, Xu Y, Zhang J, Katz A, Pearce S, Su Z, et al. Identification of a candidate gene for  
1000 a QTL for spikelet number per spike on wheat chromosome arm 7AL by high-resolution  
1001 genetic mapping. *Theor Appl Genet* [Internet]. Springer Berlin Heidelberg; 2019;132:2689–  
1002 705. Available from: <https://doi.org/10.1007/s00122-019-03382-5>
- 1003 41. Wang D, Yu K, Jin D, Sun L, Chu J, Wu W, et al. Natural variations in the promoter of Awn  
1004 Length Inhibitor 1 (ALI-1) are associated with awn elongation and grain length in common  
1005 wheat. *Plant J.* 2020;101:1075–90.
- 1006 42. Lin M, Zhang D, Liu S, Zhang G, Yu J, Fritz AK, et al. Genome-wide association analysis on  
1007 pre-harvest sprouting resistance and grain color in U.S. winter wheat. *BMC Genomics*  
1008 [Internet]. *BMC Genomics*; 2016;17. Available from: [http://dx.doi.org/10.1186/s12864-016-](http://dx.doi.org/10.1186/s12864-016-3148-6)  
1009 3148-6
- 1010 43. Beales J, Turner A, Griffiths S, Snape JW, Laurie DA. A pseudo-response regulator is  
1011 misexpressed in the photoperiod insensitive Ppd-D1a mutant of wheat (*Triticum aestivum*  
1012 L.). *Theor Appl Genet.* *Theor Appl Genet*; 2007;115:721–33.
- 1013 44. Kamran A, Iqbal M, Spaner D. Flowering time in wheat (*Triticum aestivum* L.): A key  
1014 factor for global adaptability. *Euphytica.* 2014;197:1–26.

- 1015 45. Hedden P. The genes of the Green Revolution. *Trends Genet.* 2003;19:5–9.
- 1016 46. de Los Campos G, Hickey JM, Pong-Wong R, Daetwyler HD, Calus MPL. Whole-genome  
1017 regression and prediction methods applied to plant and animal breeding. *Genetics.*  
1018 *Genetics*; 2013;193:327–45.
- 1019 47. Michel S, Löschenberger F, Ametz C, Pachler B, Sparry E, Bürstmayr H. Combining grain  
1020 yield, protein content and protein quality by multi-trait genomic selection in bread wheat.  
1021 *Theor Appl Genet* [Internet]. Springer Berlin Heidelberg; 2019;132:2767–80. Available from:  
1022 <https://doi.org/10.1007/s00122-019-03386-1>
- 1023 48. Michel S, Löschenberger F, Ametz C, Pachler B, Sparry E, Bürstmayr H. Simultaneous  
1024 selection for grain yield and protein content in genomics-assisted wheat breeding. *Theor*  
1025 *Appl Genet* [Internet]. Springer Berlin Heidelberg; 2019;132:1745–60. Available from:  
1026 <https://doi.org/10.1007/s00122-019-03312-5>
- 1027 49. Gan X, Stegle O, Behr J, Steffen JGG, Drewe P, Hildebrand KLLKL, et al. Multiple  
1028 reference genomes and transcriptomes for *Arabidopsis thaliana*. *Nature.* 2011/08/30.  
1029 2011;477:419–23.
- 1030 50. Borrill P, Harrington SA, Uauy C. Applying the latest advances in genomics and  
1031 phenomics for trait discovery in polyploid wheat. *Plant J.* 2019;97:56–72.
- 1032 51. Fradgley N, Gardner KA, Cockram J, Elderfield J, Hickey JM, Howell P, et al. A large-scale  
1033 pedigree resource of wheat reveals evidence for adaptation and selection by breeders. *PLoS*  
1034 *Biol.* 2019;17:1–20.
- 1035 52. van de Wouw M, van Hintum T, Kik C, van Treuren R, Visser B. Genetic diversity trends in  
1036 twentieth century crop cultivars: A meta analysis. *Theor Appl Genet.* 2010;120:1241–52.
- 1037 53. Fu YB. Understanding crop genetic diversity under modern plant breeding. *Theor Appl*  
1038 *Genet.* Springer Berlin Heidelberg; 2015;128:2131–42.

- 1039 54. Baud A, Hermesen R, Guryev V, Stridh P, Graham D, McBride MWMW, et al. Combined  
1040 sequence-based and genetic mapping analysis of complex traits in outbred rats. *Nat Genet.*  
1041 2013;45:767–75.
- 1042 55. Bogard M, Allard V, Brancourt-Hulmel M, Heumez E, Machet J-M, Jeuffroy M-H, et al.  
1043 Deviation from the grain protein concentration–grain yield negative relationship is highly  
1044 correlated to post-anthesis N uptake in winter wheat. *J Exp Bot. Oxford Academic;*  
1045 2010;61:4303–12.
- 1046 56. Cormier F, Faure S, Dubreuil P, Heumez E, Beauchêne K, Lafarge S, et al. A multi-  
1047 environmental study of recent breeding progress on nitrogen use efficiency in wheat  
1048 (*Triticum aestivum* L.). *Theor Appl Genet.* 2013;126:3035–48.
- 1049 57. Lenz PRN, Beaulieu J, Mansfield SD, Clément S, Desponts M, Bousquet J. Factors  
1050 affecting the accuracy of genomic selection for growth and wood quality traits in an  
1051 advanced-breeding population of black spruce (*Picea mariana*). *BMC Genomics. BMC*  
1052 *Genomics;* 2017;18:1–17.
- 1053 58. Moser G, Khatkar MS, Hayes BJ, Raadsma HW. Accuracy of direct genomic values in  
1054 Holstein bulls and cows using subsets of SNP markers. *Genet Sel Evol.* 2010;42:1–15.
- 1055 59. Duncan L, Shen H, Gelaye B, Meijssen J, Ressler K, Feldman M, et al. Analysis of polygenic  
1056 risk score usage and performance in diverse human populations. *Nat Commun. Nature*  
1057 *Publishing Group;* 2019;10:3328.
- 1058 60. Liu K, Muse S V. PowerMaker: An integrated analysis environment for genetic marker  
1059 analysis. *Bioinformatics.* 2005;21:2128–9.
- 1060 61. Porras-Hurtado L, Ruiz Y, Santos C, Phillips C, Carracedo Á, Lareu M V. An overview of  
1061 STRUCTURE: Applications, parameter settings, and supporting software. *Front Genet.*  
1062 2013;4:1–13.



- 1063 62. Mackay IJ, Bansept-Basler P, Bentley AR, Cockram J, Gosman N, Greenland AJ, et al. An  
1064 eight-parent multiparent advanced generation inter-cross population for winter-sown  
1065 wheat: Creation, properties, and validation. *G3 Genes, Genomes, Genet.* 2014;4:1603–10.
- 1066 63. Butler D, Cullis B, Gilmour A, Gogel B. ASReml–R Reference Manual [Internet]. Brisbane:  
1067 The State of Queensland, Department of Primary Industries and Fisheries; 2009. Available  
1068 from:  
1069 [http://scholar.google.com/scholar?hl=en&btnG=Search&q=intitle:mixed+models+for+S+lan](http://scholar.google.com/scholar?hl=en&btnG=Search&q=intitle:mixed+models+for+S+language+environments+ASReml-R+reference+manual#0)  
1070 [guage+environments+ASReml-R+reference+manual#0](http://scholar.google.com/scholar?hl=en&btnG=Search&q=intitle:mixed+models+for+S+language+environments+ASReml-R+reference+manual#0)
- 1071 64. Li H, Durbin R. Fast and accurate short read alignment with Burrows-Wheeler transform.  
1072 *Bioinformatics.* 2009/05/20. 2009;25:1754–60.
- 1073 65. Li H, Handsaker B, Wysoker A, Fennell T, Ruan J, Homer N, et al. The Sequence  
1074 Alignment/Map format and SAMtools. *Bioinformatics.* 2009/06/10. 2009;25:2078–9.
- 1075 66. McKenna A, Hanna M, Banks E, Sivachenko A, Cibulskis K, Kernytsky A, et al. The  
1076 Genome Analysis Toolkit: a MapReduce framework for analyzing next-generation DNA  
1077 sequencing data. *Genome Res.* 2010;20:1297–303.
- 1078 67. Li H. A statistical framework for SNP calling, mutation discovery, association mapping  
1079 and population genetical parameter estimation from sequencing data. *Bioinformatics.*  
1080 2011;27:2987–93.
- 1081 68. R Core Team. R: A Language and Environment for Statistical Computing. Vienna, Austria;  
1082 2016.
- 1083 69. Kang HM, Zaitlen NA, Wade CM, Kirby A, Heckerman D, Daly MJ, et al. Efficient control  
1084 of population structure in model organism association mapping. *Genetics.* 2008/04/04.  
1085 2008;178:1709–23.
- 1086 70. VanRaden P. Efficient estimation of breeding values from dense genomic data. *J Dairy*

1087 Sci. 2007;90:374–5.

1088 71. Habier D, Fernando RL, Dekkers JCM. The impact of genetic relationship information on  
1089 genome-assisted breeding values. *Genetics*. 2007;177:2389–97.

1090 72. Friedman J, Hastie T, Tibshirani R. glmnet: Lasso and elastic-net regularized generalized  
1091 linear models. R Packag version 14. 2009;

1092
